# Supplementary material for: Aromatic heterocycle galectin-1 interactions for selective single-digit nM affinity ligands
Source: PubMed Central journal article supplement (PMC9082524; doi:10.1039/c8ra04389b), 2018-07-11
Supplement: RA-008-C8RA04389B-s001.pdf [file RA-008-C8RA04389B-s001.pdf]

## Supporting Information

### Aromatic heterocycle galectin-1 interactions for selective single-digit nM affinity ligands

Kristoffer Peterson,<sup>a</sup> Patrick M. Collins,<sup>b</sup> Xiaoli Huang,<sup>c</sup> Barbro Kahl-Knutsson,<sup>d</sup> Sofia Essén,<sup>a</sup>  
Fredrik R. Zetterberg,<sup>e</sup> Stina Oredsson,<sup>c</sup> Hakon Leffler,<sup>d</sup> Helen Blanchard<sup>b\*</sup> and Ulf J. Nilsson<sup>a\*</sup>

<sup>a</sup> *Centre for Analysis and Synthesis, Department of Chemistry, Lund University, POB 124, 221 00,  
Lund, Sweden*

<sup>b</sup> *Institute for Glycomics, Griffith University Gold Coast Campus, Queensland 4222, Australia*

<sup>c</sup> *Department of Biology, Lund University, POB 118, 221 00, Lund, Sweden*

<sup>d</sup> *Department of Laboratory Medicine, Section MIG, Lund University BMC-C1228b, Klinikgatan  
28, 221 84 Lund, Sweden*

<sup>e</sup> *Galecto Biotech AB, Sahlgrenska Science Park, Medicinaregatan 8 A, 413 46  
Gothenburg, Sweden*

\*Corresponding author. *Email:* ulf.nilsson@chem.lu.se

#### Table of Contents

|         |                                            |
|---------|--------------------------------------------|
| S2-S20  | NMR-spectra                                |
| S21-S27 | Purity chromatograms                       |
| S28     | Fluorescence polarization titration curves |
| S29     | Dose response curves from the MTT assay    |
| S30-S31 | Crystallographic data                      |



# NMR spectra of synthesized compounds

## *p*-Methylphenyl 3-azido-3-deoxy-1-thio- $\beta$ -D-galactopyranoside 3

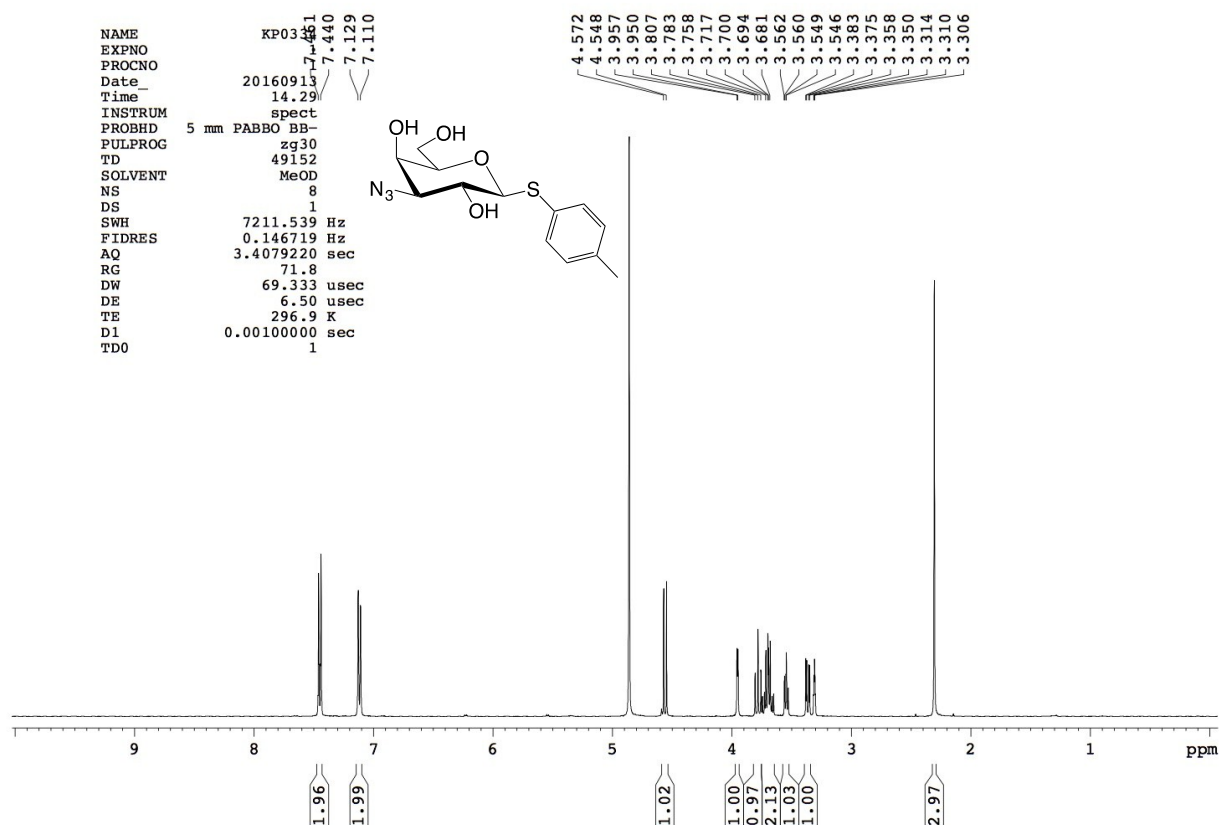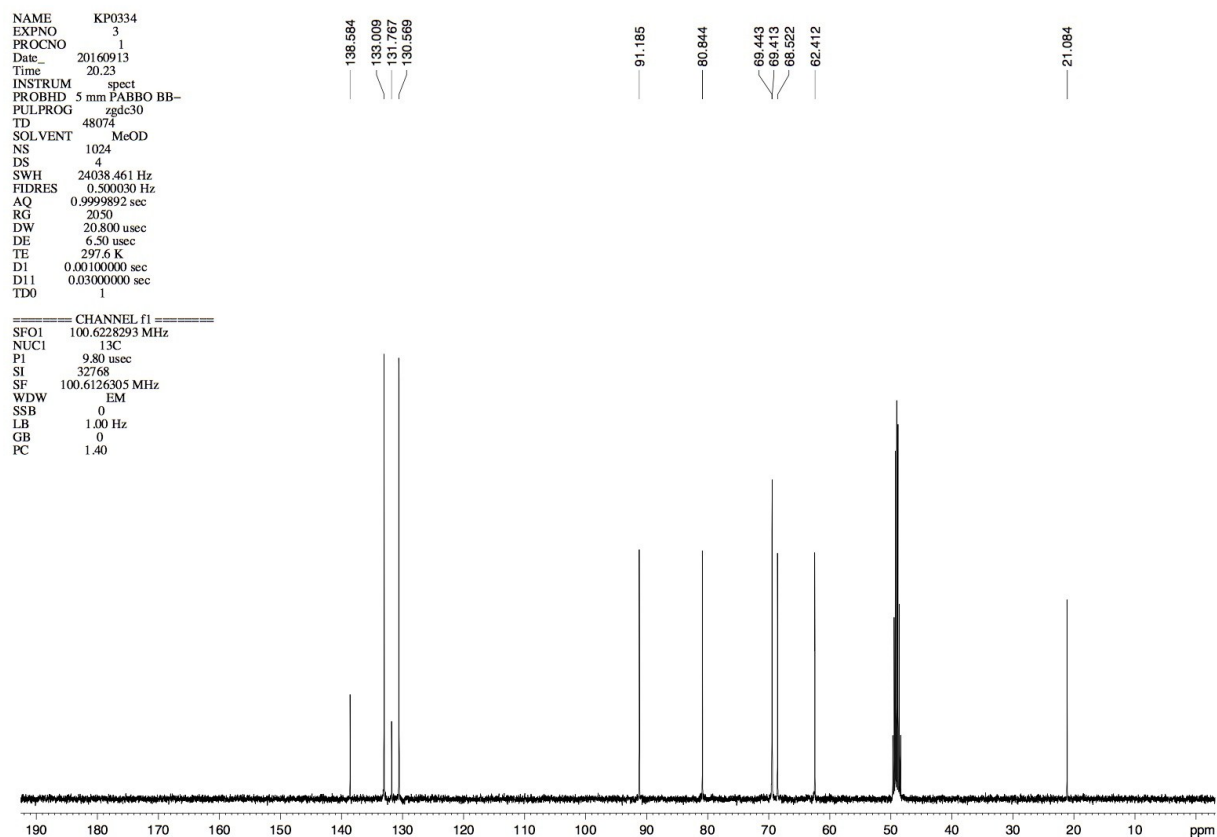

**p-Methylphenyl  
galactopyranoside 4**

**3-deoxy-3-[4-(cyclopentyl)-1H-1,2,3-triazol-1-yl]-1-thio-β-D-**

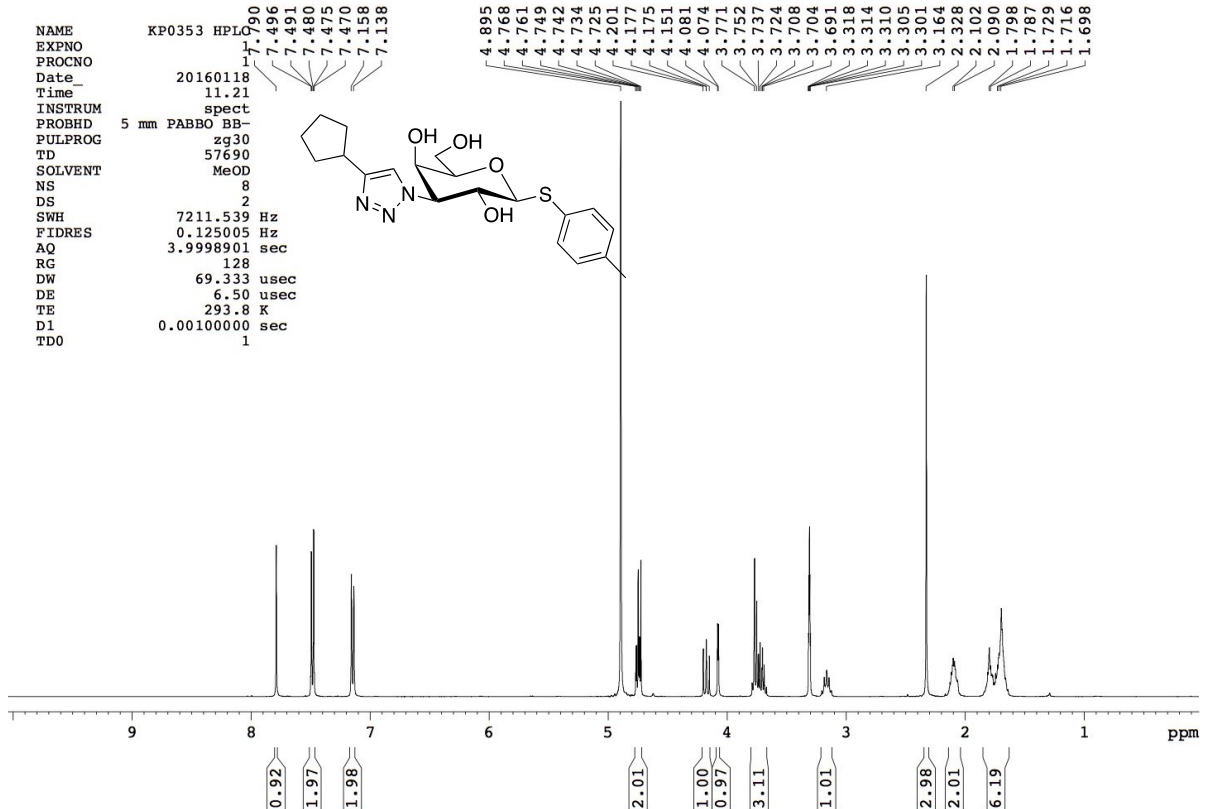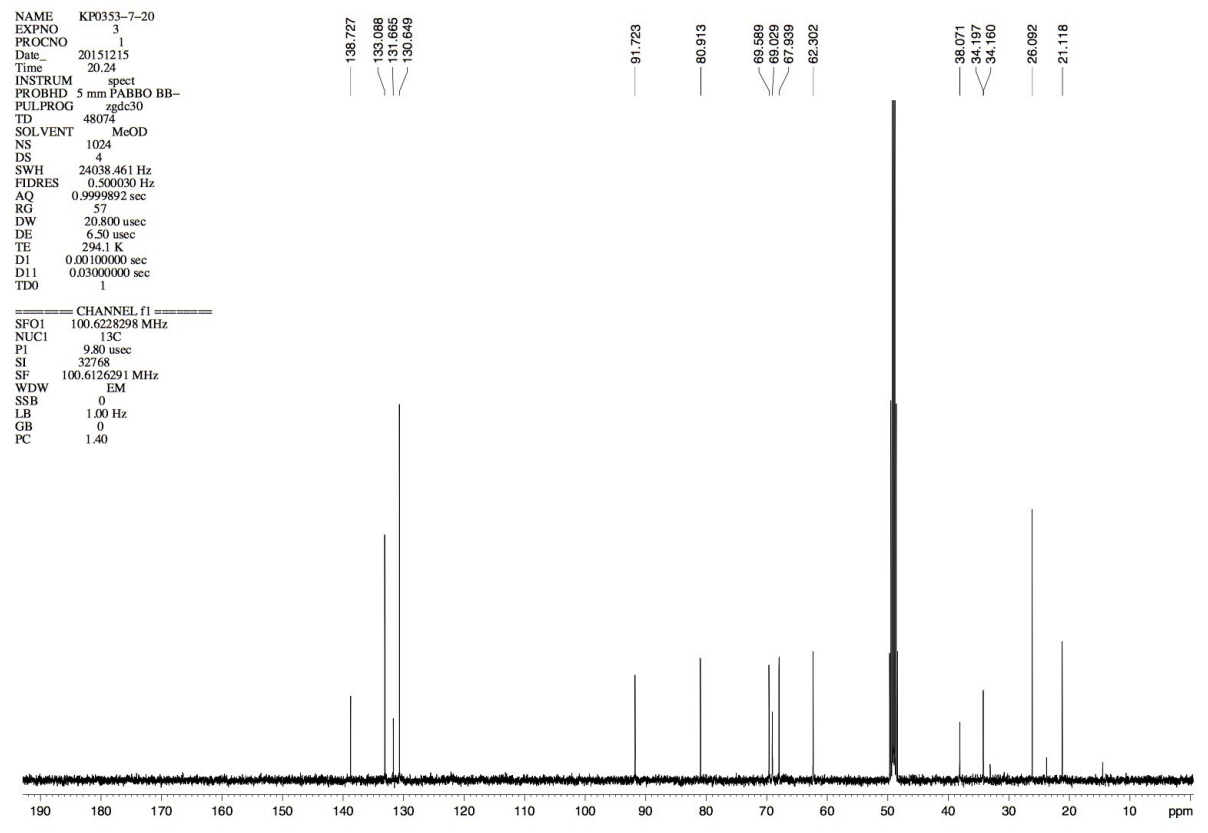

*p*-Methylphenyl 3-deoxy-3-[4-(furan-3-yl)-1*H*-1,2,3-triazol-1-yl]-1-thio- $\beta$ -D-galactopyranoside

5

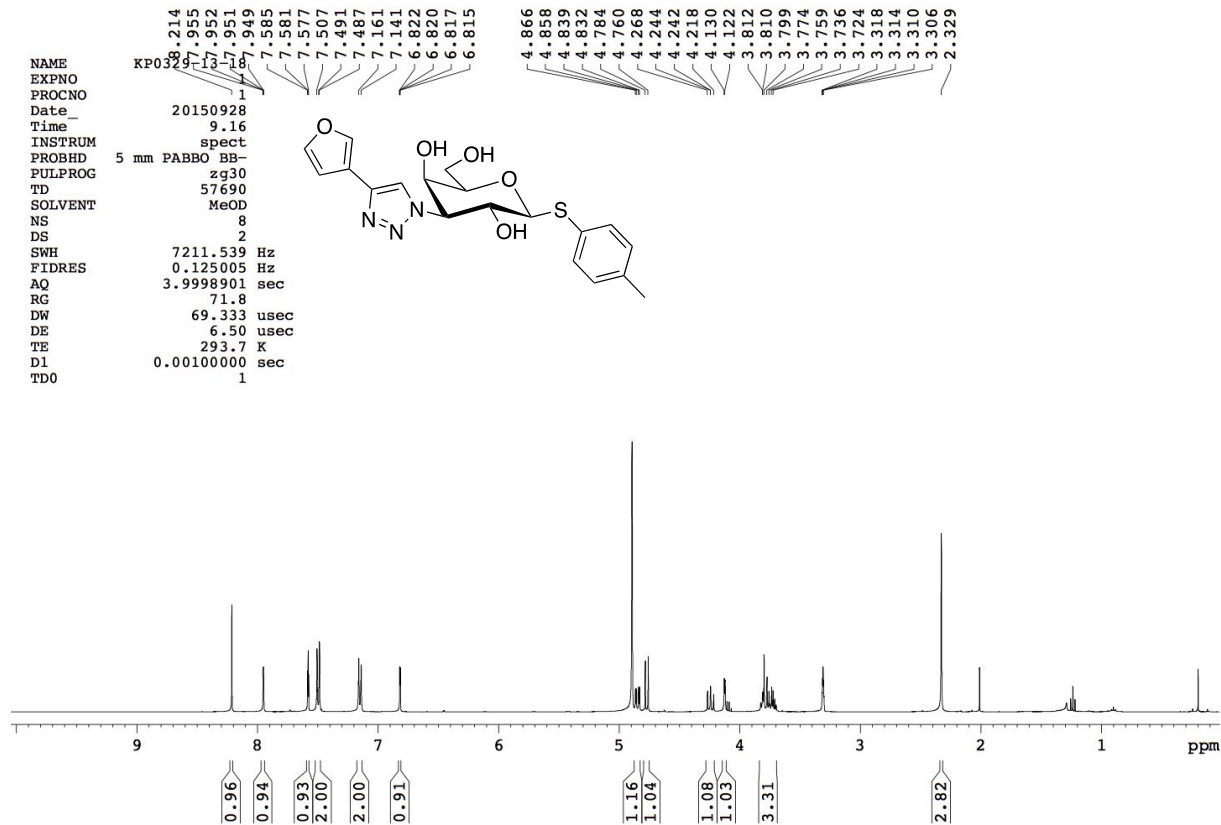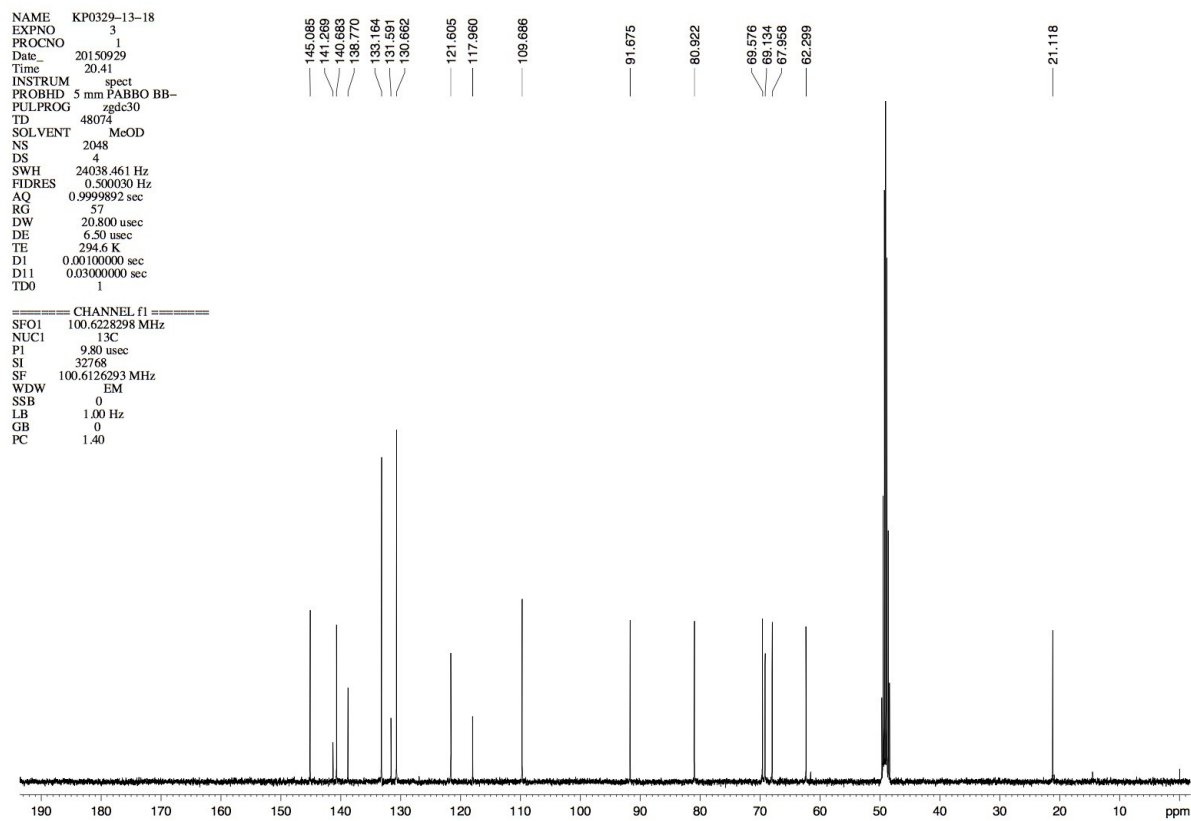

*p*-Methylphenyl 3-deoxy-3-[4-(thien-2-yl)-1*H*-1,2,3-triazol-1-yl]-1-thio- $\beta$ -D-galactopyranoside

6

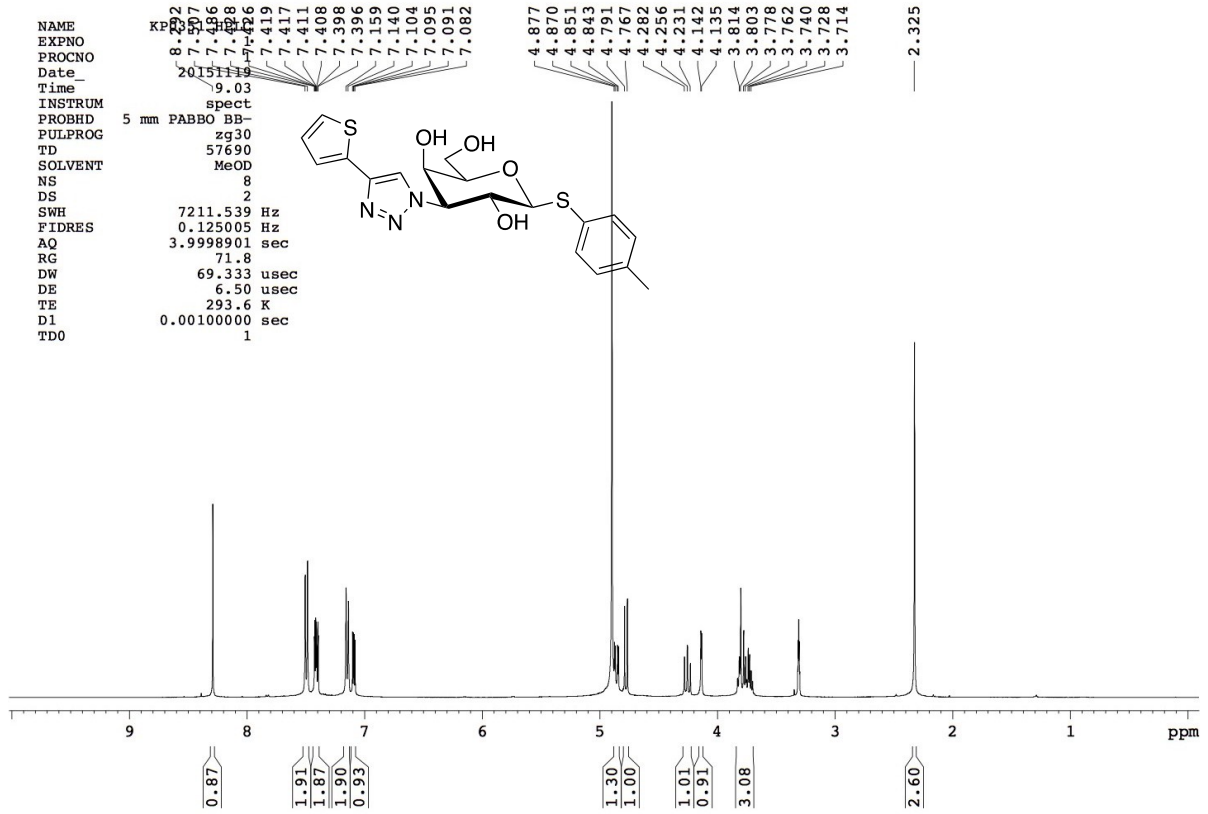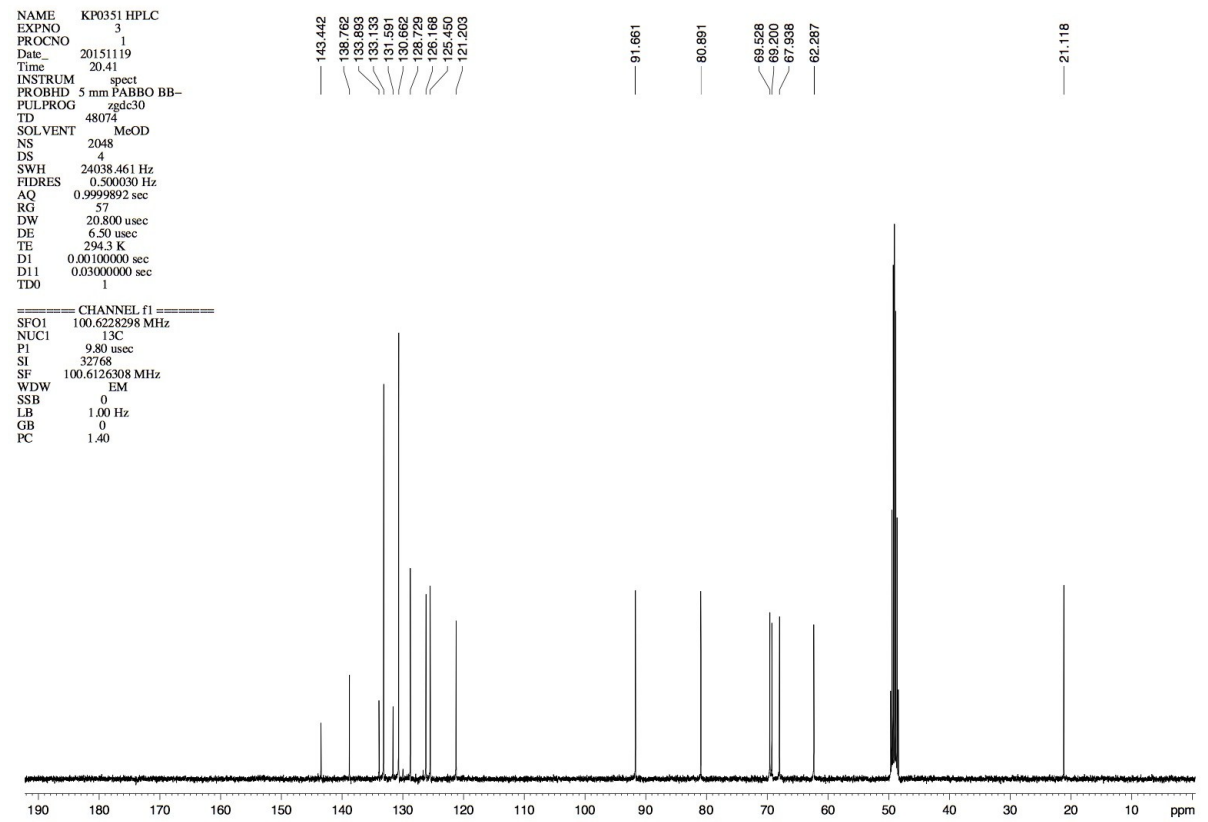

***p*-Methylphenyl 3-deoxy-3-[4-(thien-3-yl)-1*H*-1,2,3-triazol-1-yl]-1-thio- $\beta$ -D-galactopyranoside**

7

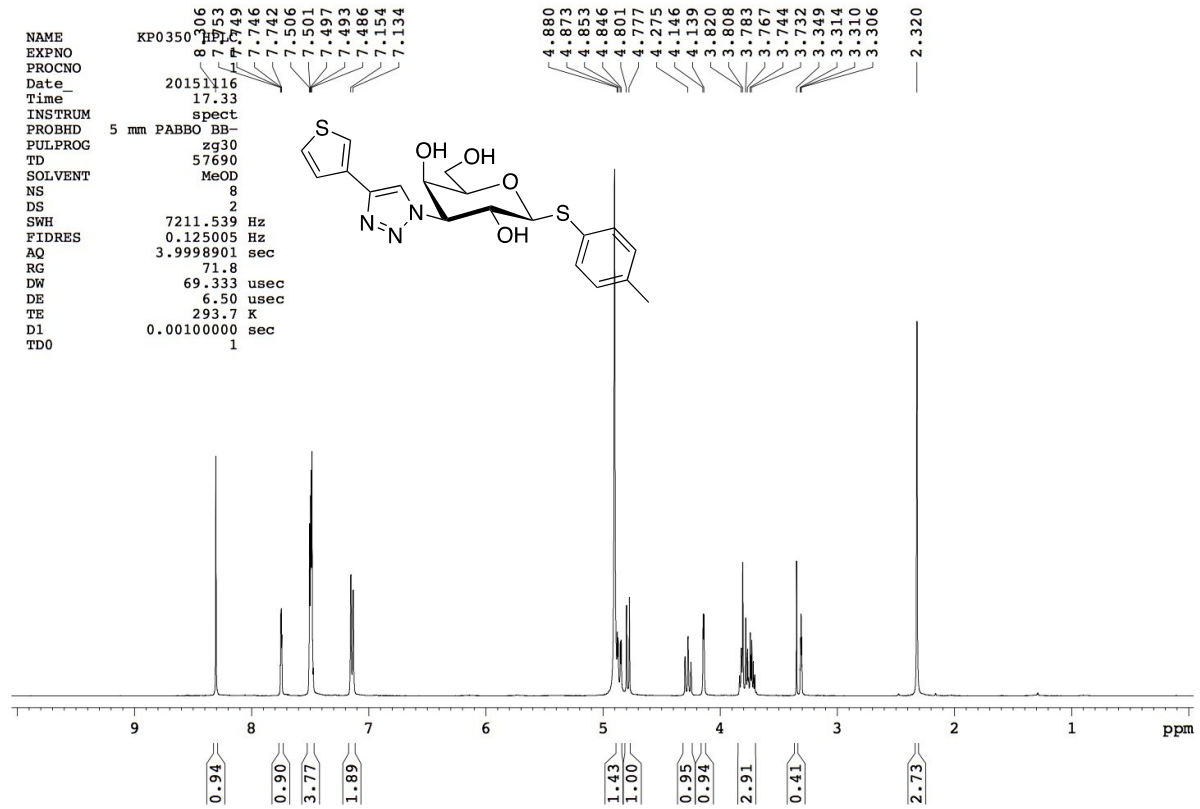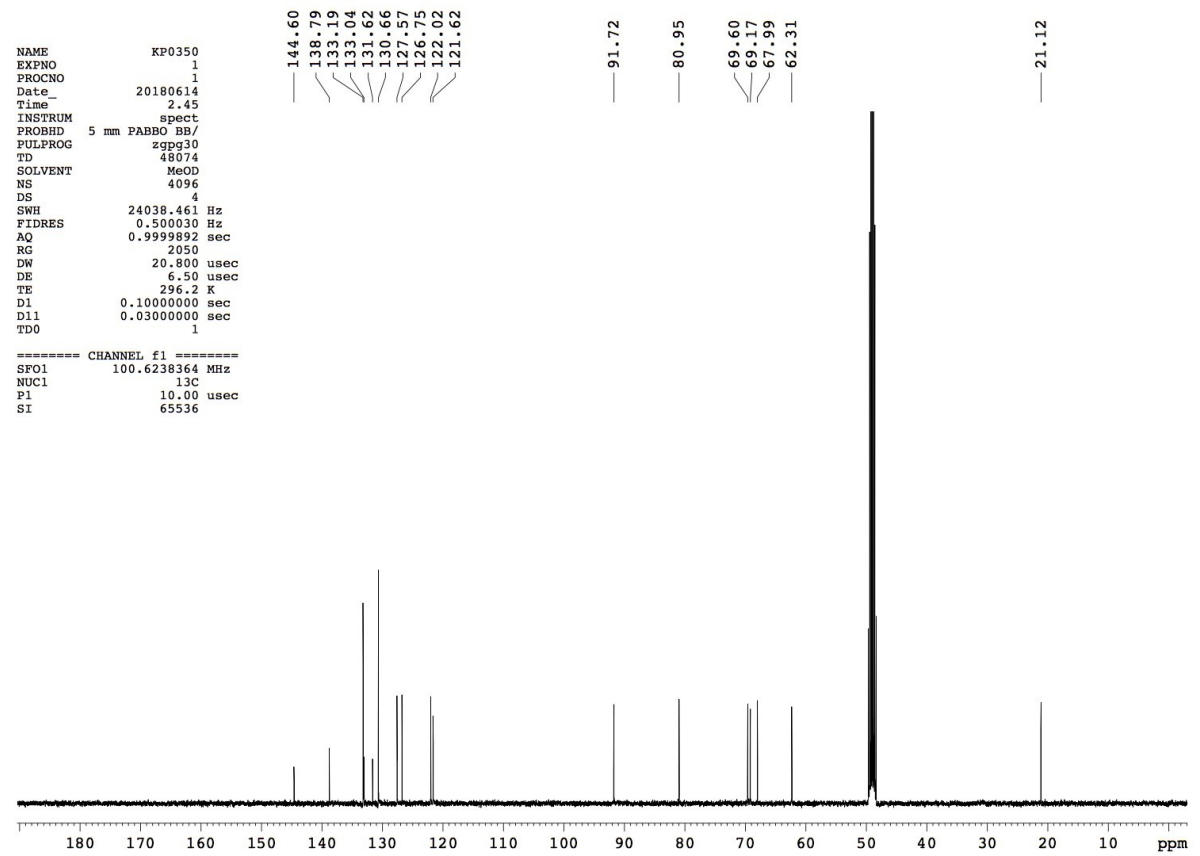

*p*-Methylphenyl  
galactopyranoside 8

3-deoxy-3-[4-(1*H*-imidazol-2-yl)-1*H*-1,2,3-triazol-1-yl]-1-thio- $\beta$ -D-

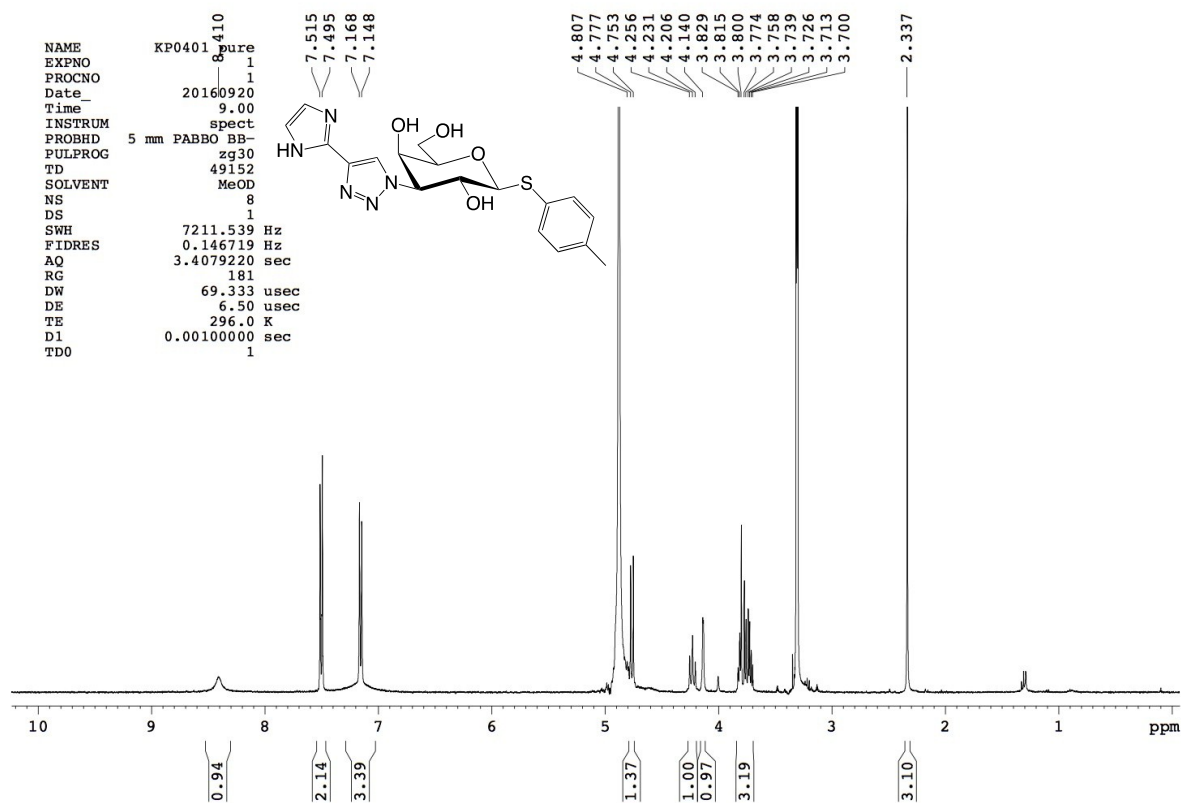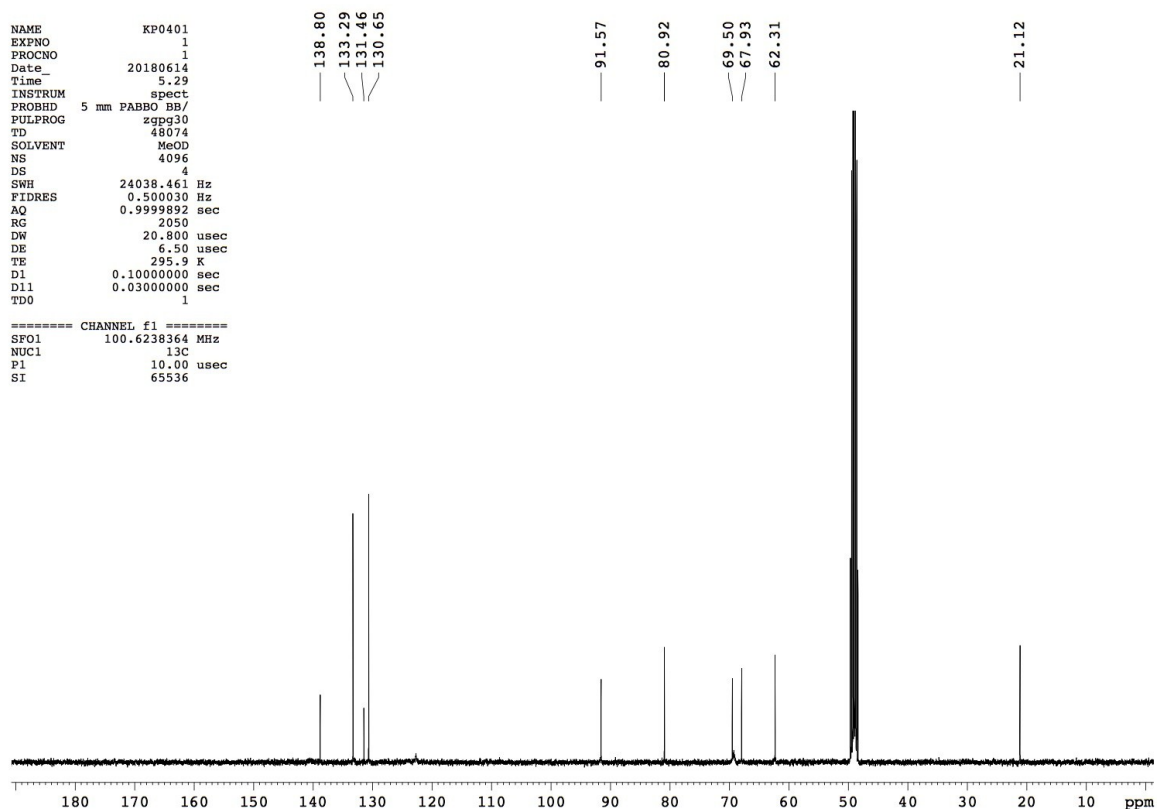



*p*-Methylphenyl  
galactopyranoside 9

3-deoxy-3-[4-(1*H*-imidazol-4-yl)-1*H*-1,2,3-triazol-1-yl]-1-thio- $\beta$ -D-

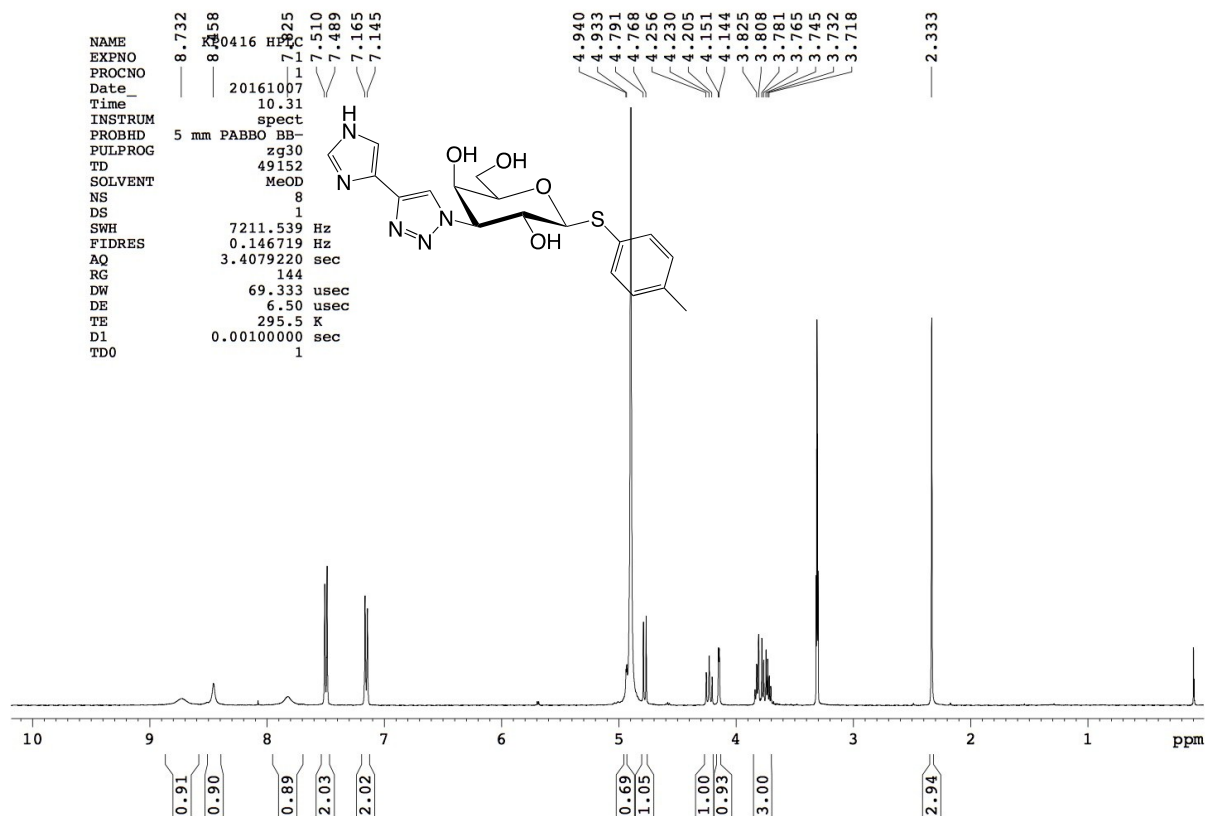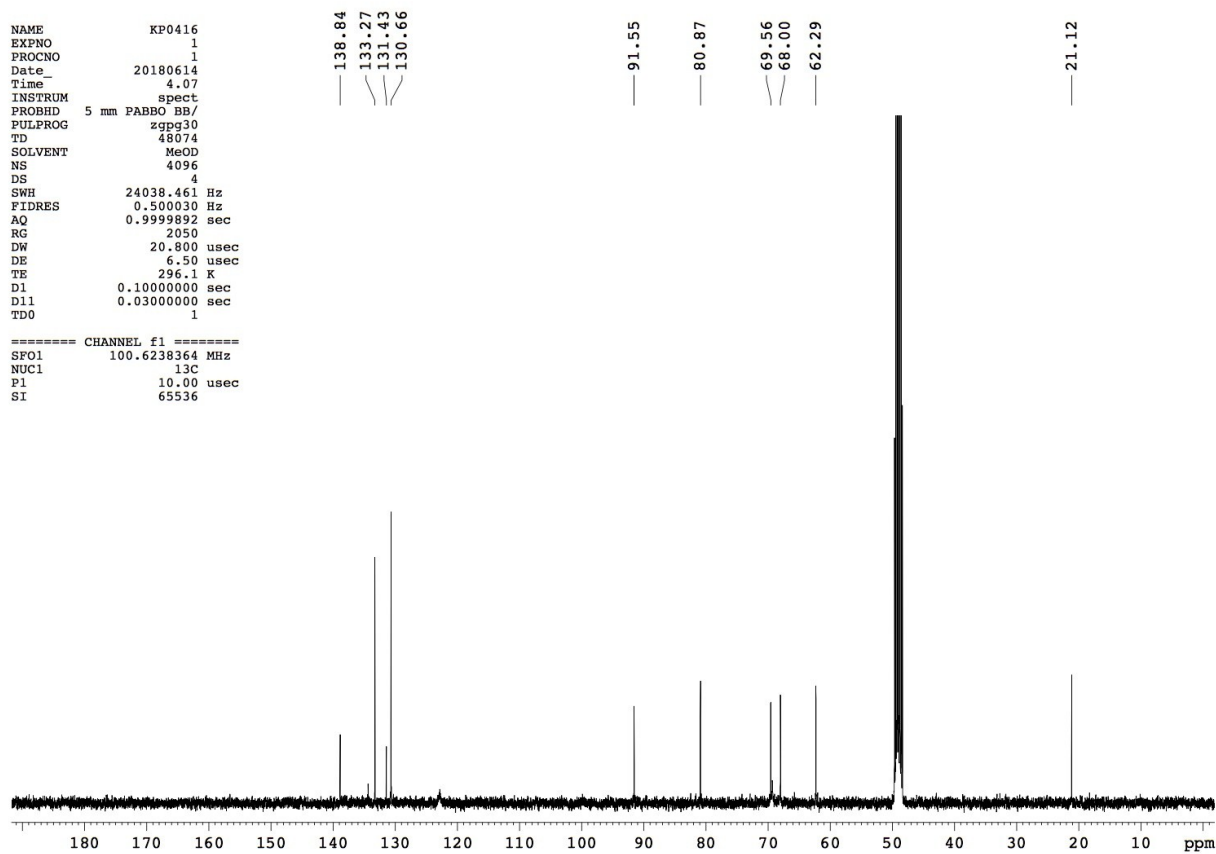

# Methyl glycolate-2,4,6-tri-O-acetyl-3-azido-3-deoxy-1-thio-β-D-galactopyranoside 11

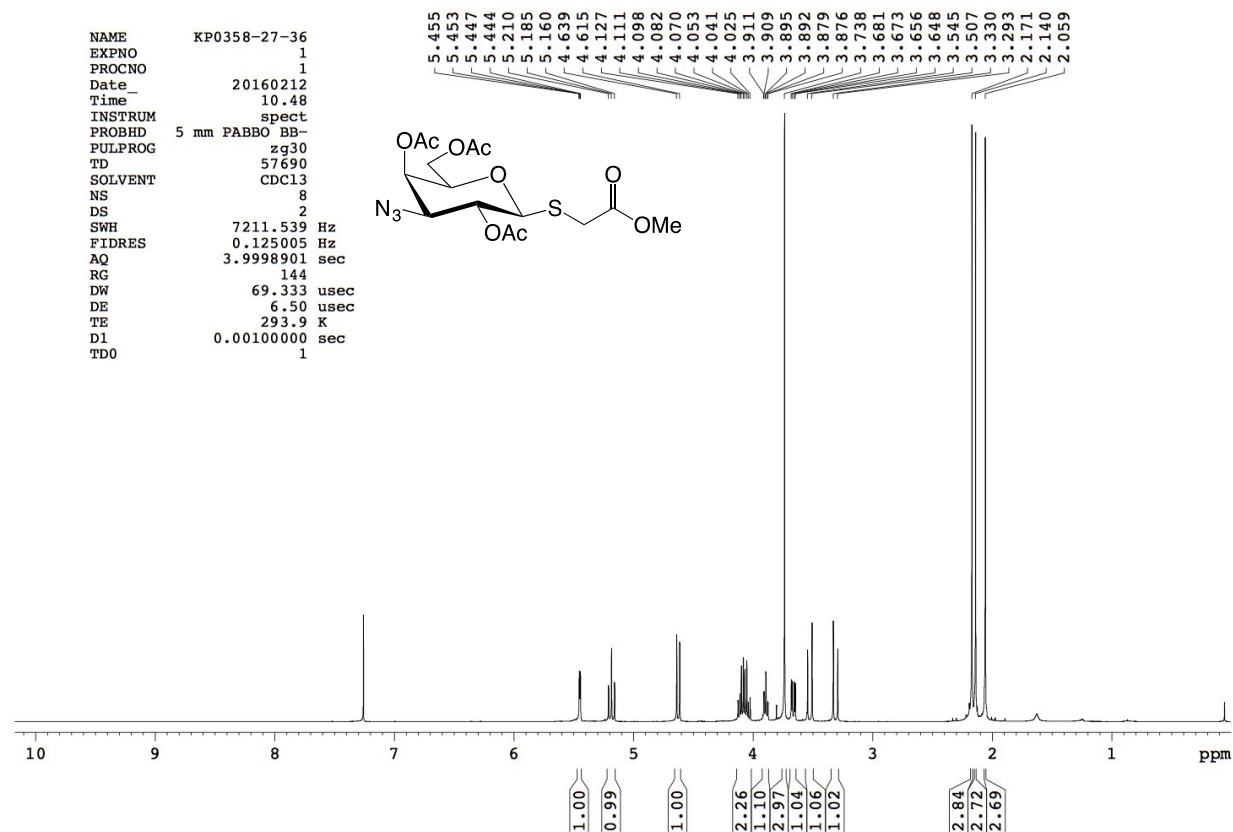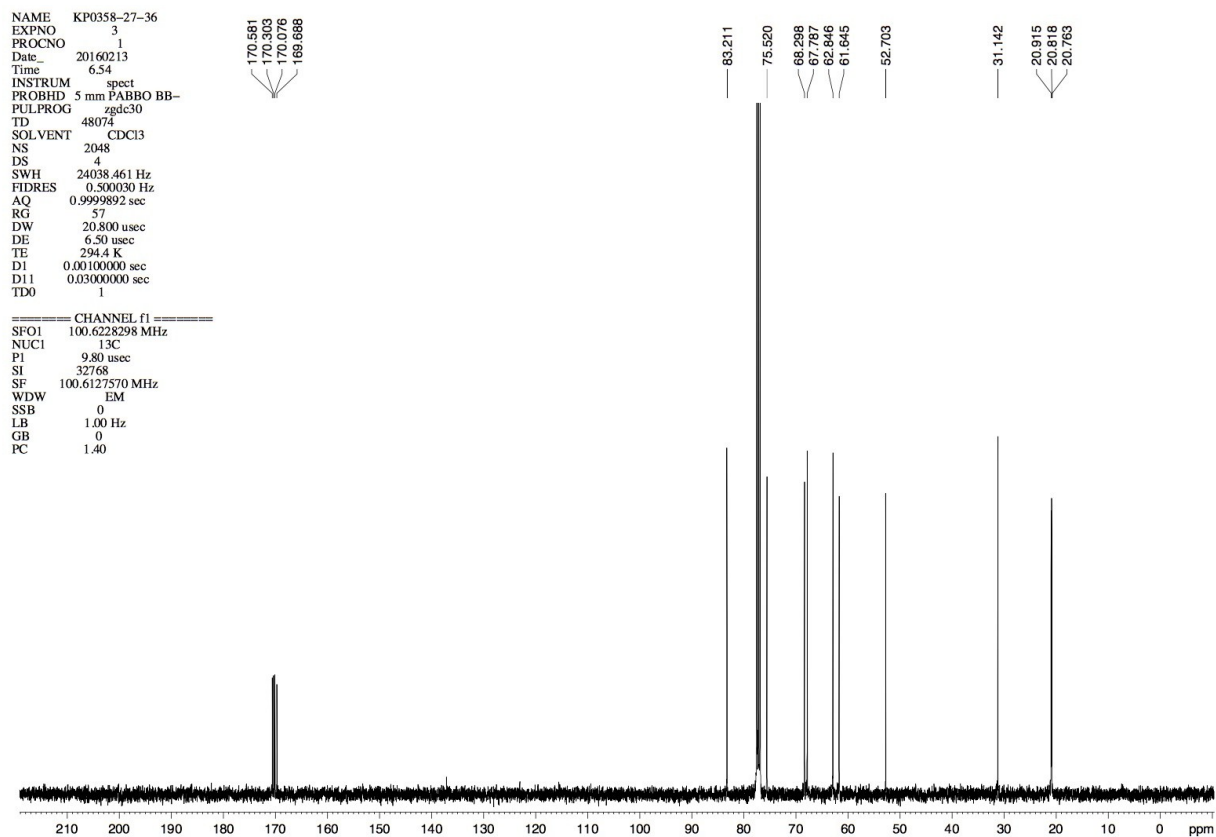

# 1,3-Dideoxy-3-[4-(thien-3-yl)-1H-1,2,3-triazol-1-yl]-1-thiocarboxymethyl-β-D-galactopyranoside 12

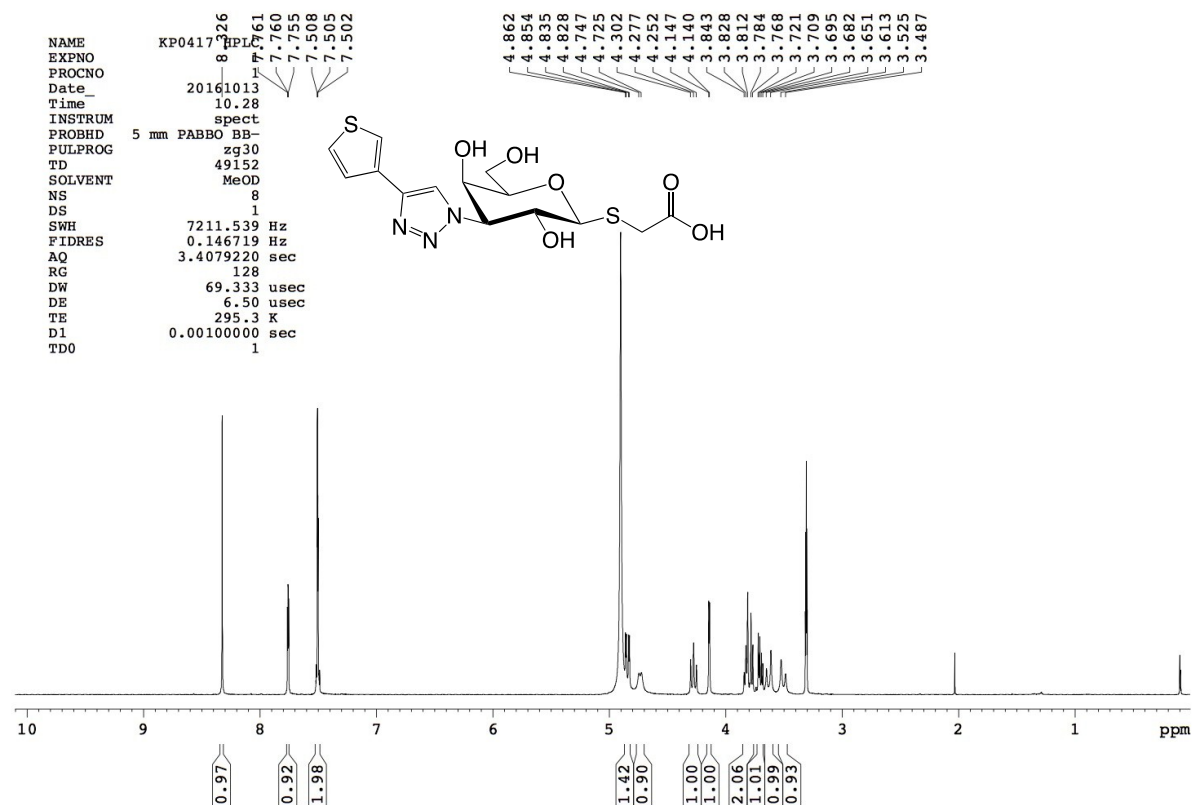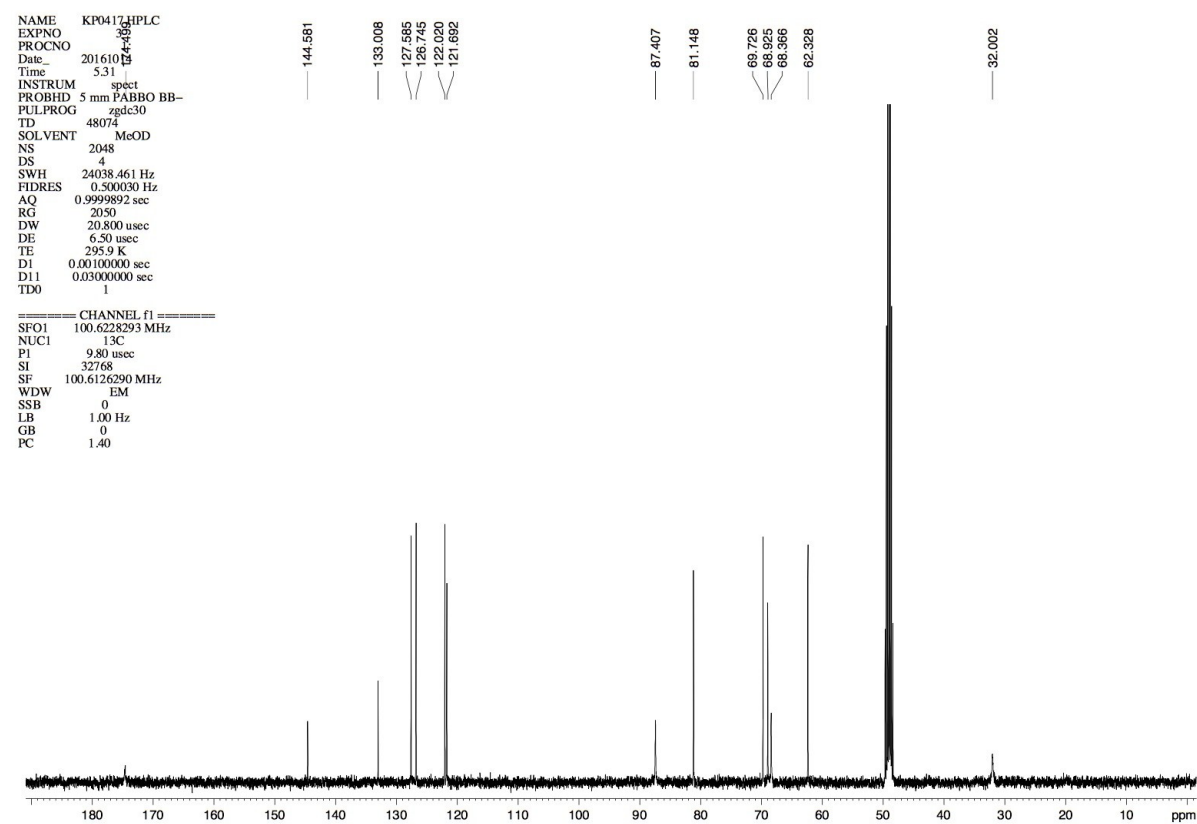

# 1,3-Dideoxy-3-[4-(thiazol-2-yl)-1*H*-1,2,3-triazol-1-yl]-1-thiocarboxymethyl-β-D-galactopyranoside 13

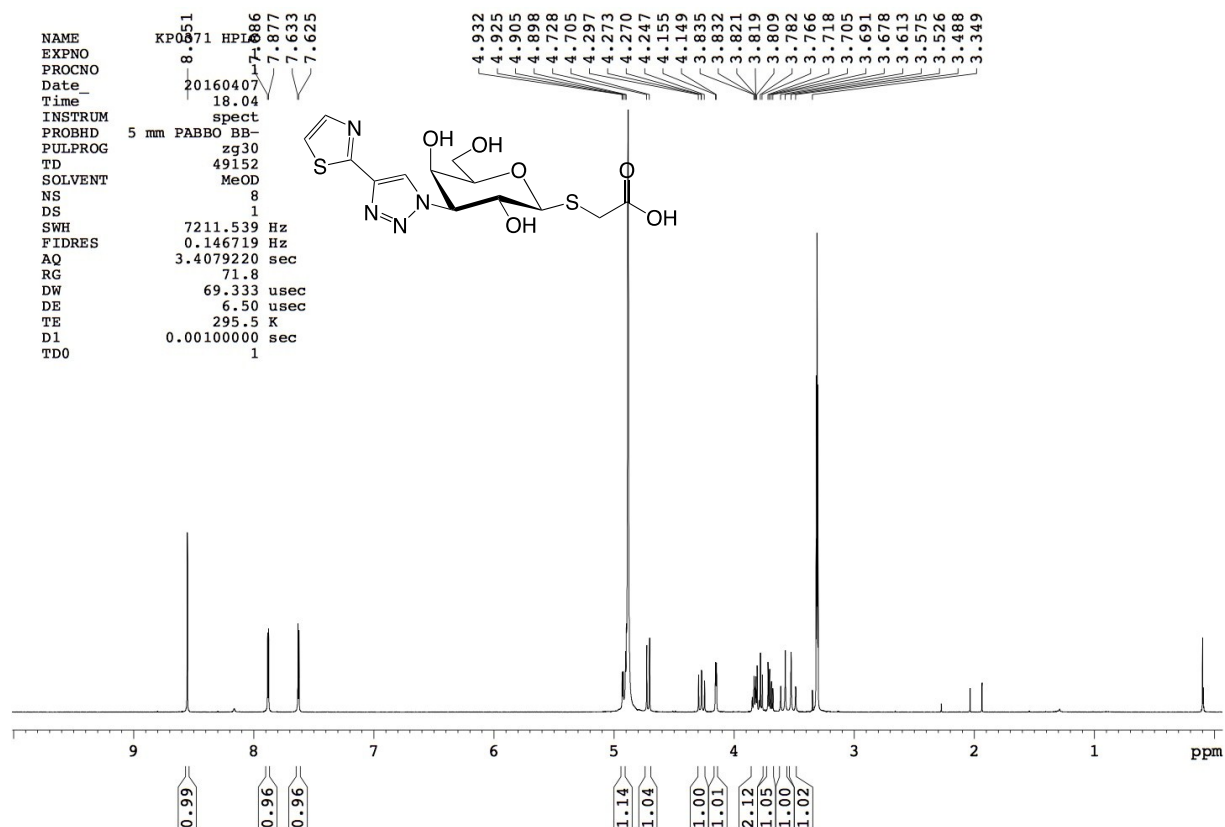

NAME KP0371 HPLC  
 EXPNO 3  
 PROCNO 1  
 Date\_ 20160408 160930  
 Time 3.50  
 INSTRUM spect  
 PROBHD 5 mm PABBO BB-  
 PULPROG zgdc30  
 TD 48074  
 SOLVENT MeOD  
 NS 2048  
 DS 4  
 SWH 24038.461 Hz  
 FIDRES 0.500030 Hz  
 AQ 0.9999892 sec  
 RG 57  
 DW 20.800 usec  
 DE 6.50 usec  
 TE 296.1 K  
 D1 0.00100000 sec  
 D11 0.03000000 sec  
 TD0 1

CHANNEL f1  
 SFO1 100.6228293 MHz  
 NUC1 13C  
 P1 9.80 usec  
 SI 32768  
 SF 100.6126266 MHz  
 WDW EM  
 SSB 0  
 LB 1.00 Hz  
 GB 0  
 PC 1.40

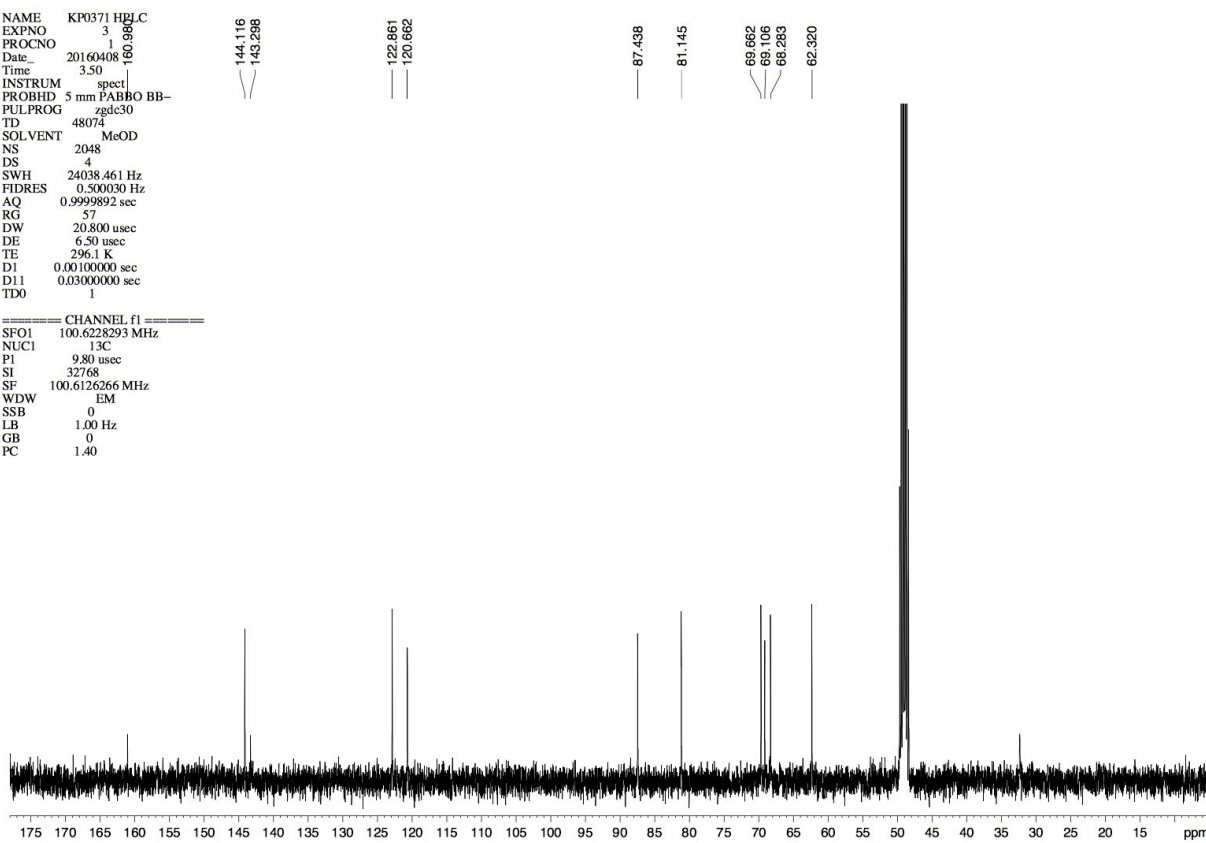

# 1,3-Dideoxy-3-[4-(thiazol-4-yl)-1*H*-1,2,3-triazol-1-yl]-1-thiocarboxymethyl-β-D-galactopyranoside 14

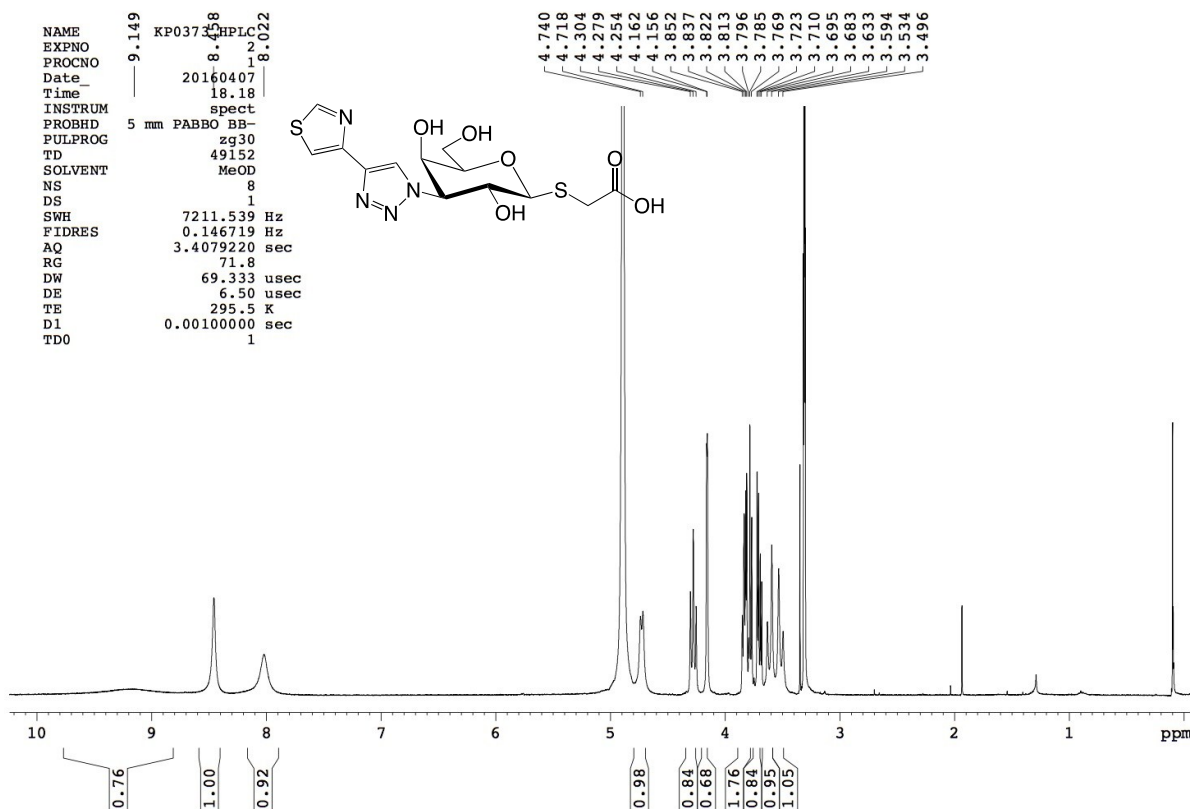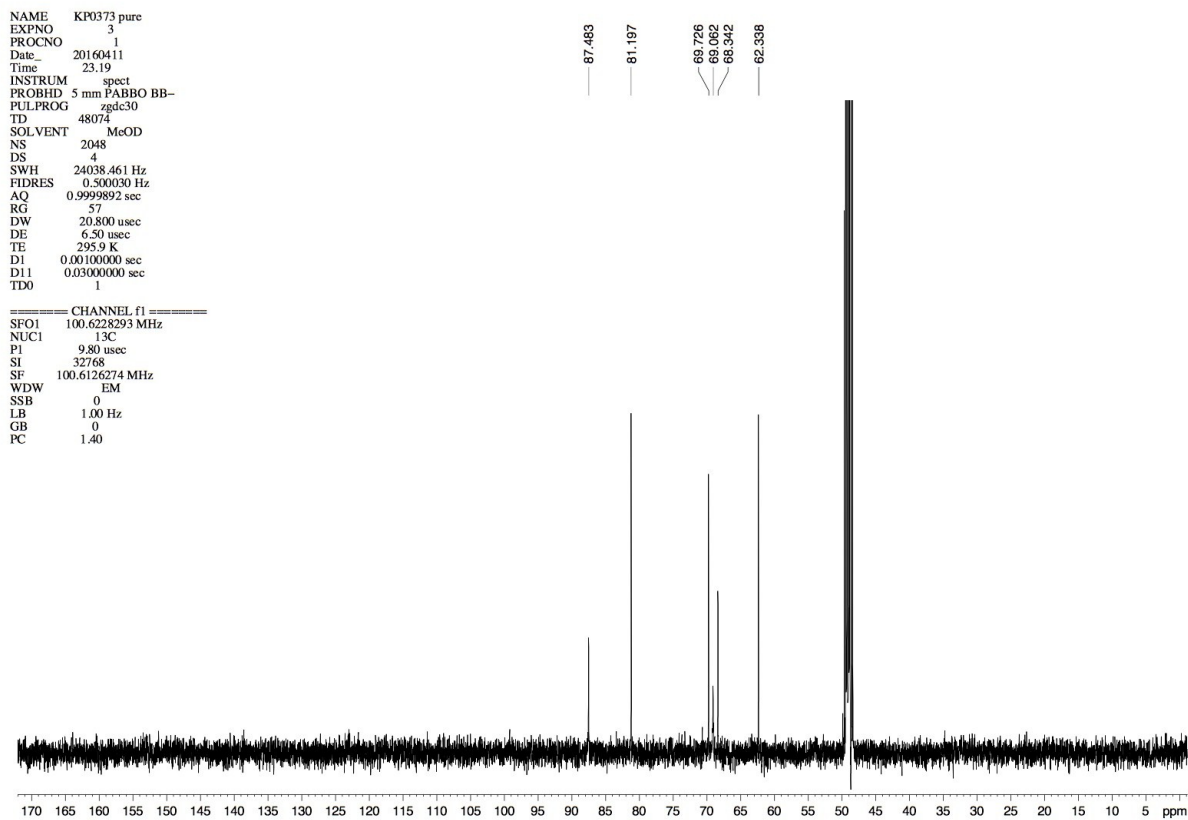

# 1,3-Dideoxy-3-[4-(thiazol-5-yl)-1H-1,2,3-triazol-1-yl]-1-thiocarboxymethyl-β-D-galactopyranoside 15

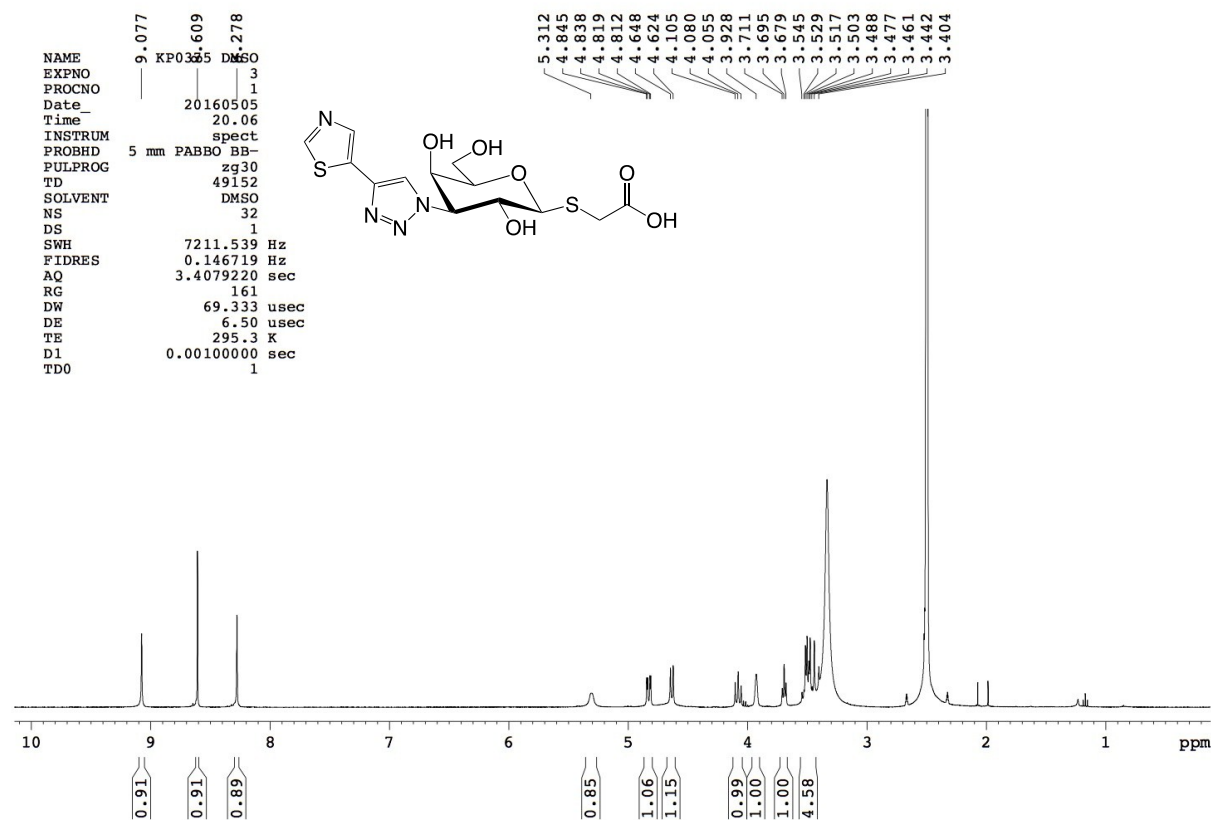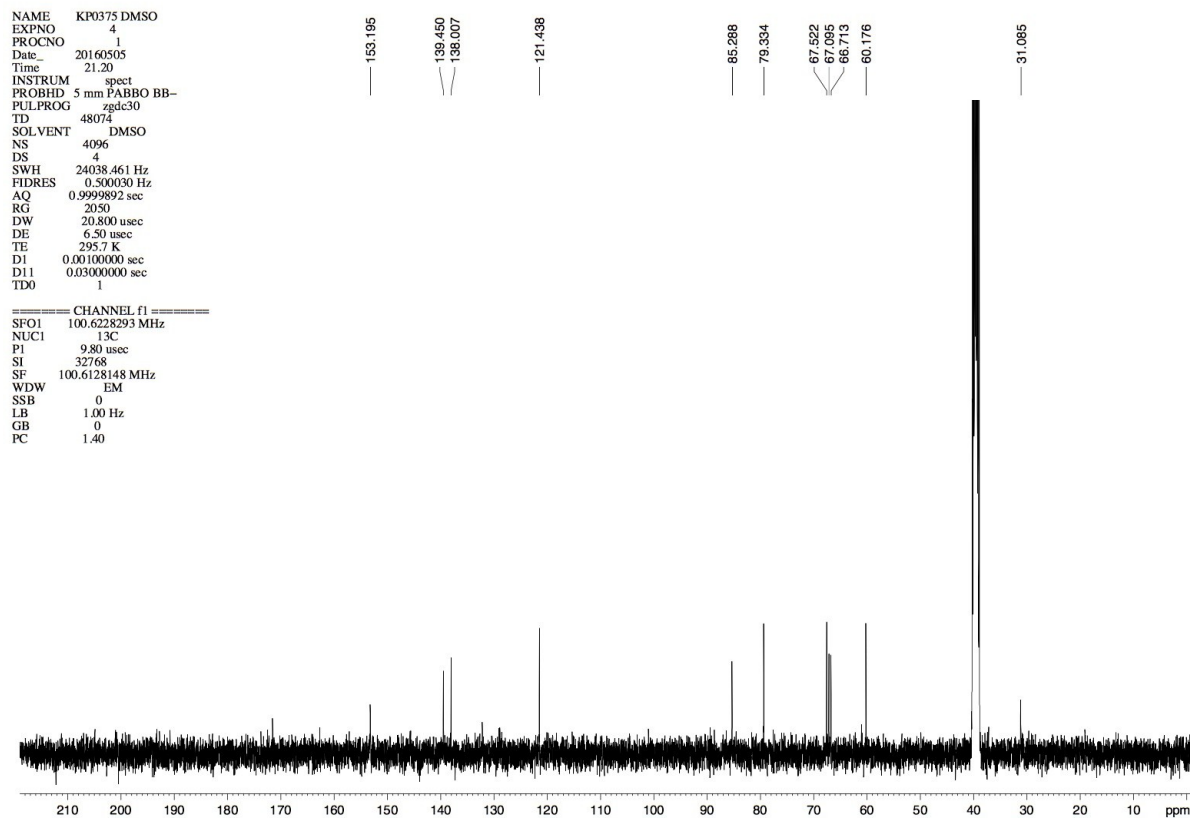

# 1-1'-sulfanediyl-bis-{3-deoxy-3-[4-(thiazol-2-yl)-1H-1,2,3-triazol-1-yl]-β-D-galactopyranoside} 19

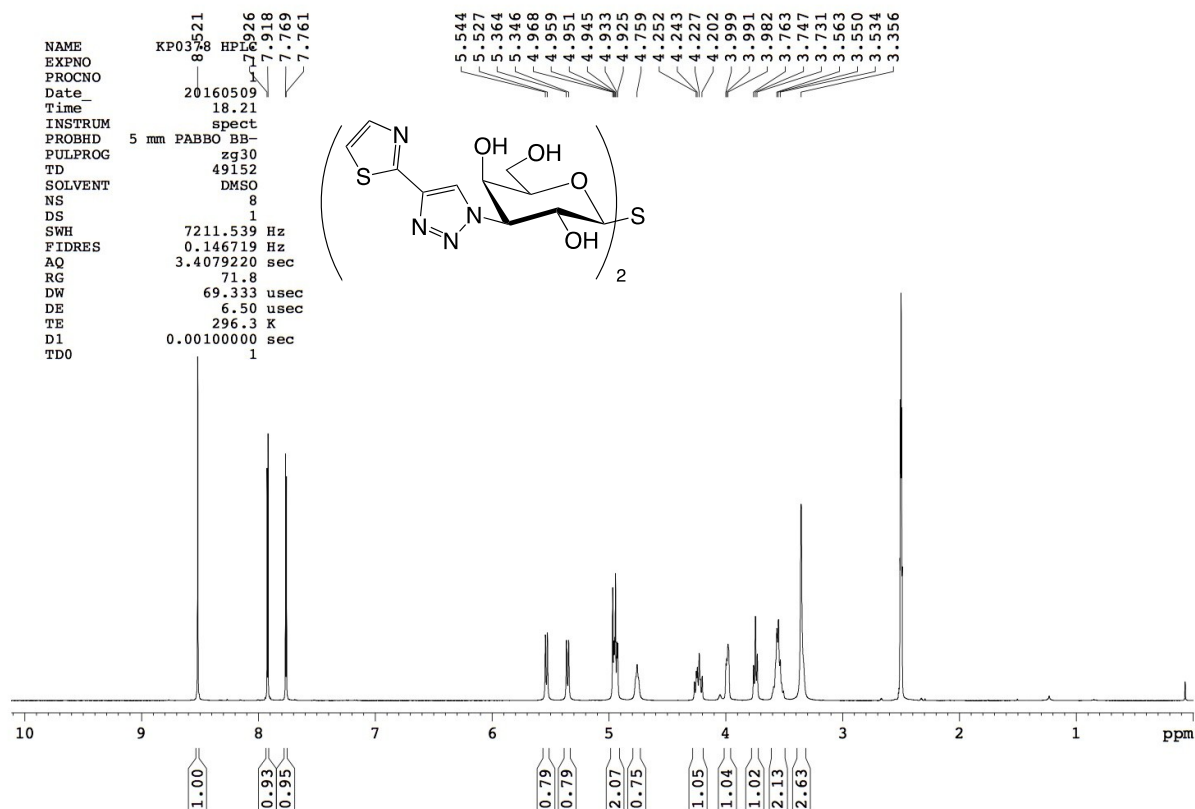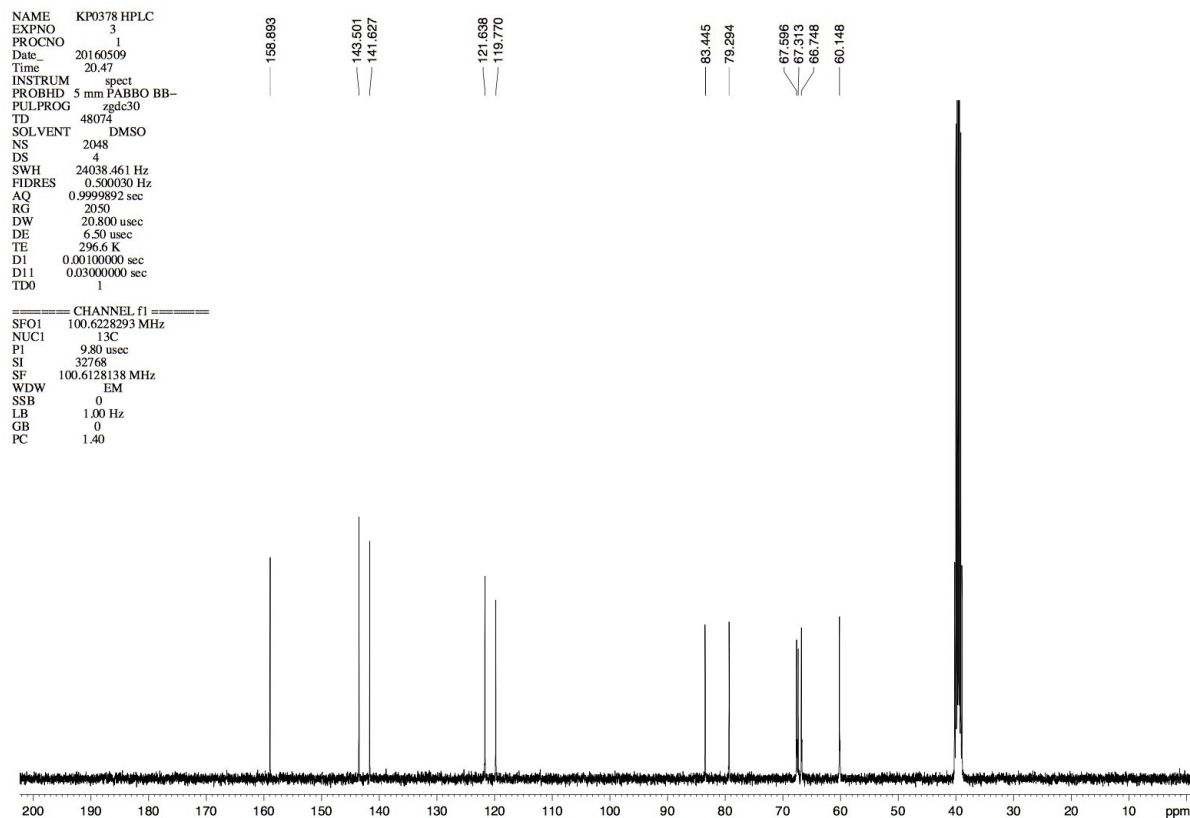



# 1-1'-sulfanediyl-bis-{3-deoxy-3-[4-(1*H*-imidazol-2-yl)-1*H*-1,2,3-triazol-1-yl]-β-D-galactopyranoside} 20

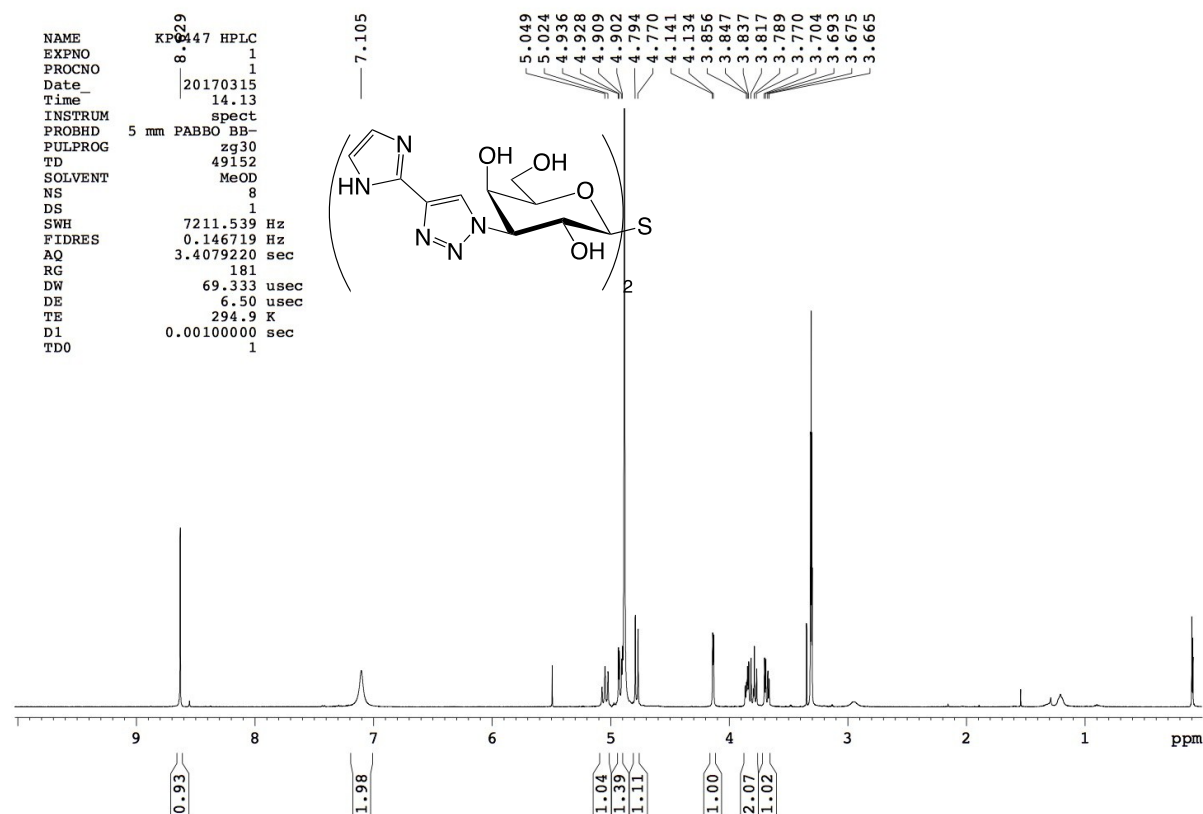

NAME KP0447 HPLC  
 EXPNO 4  
 PROCNO 1  
 Date\_ 20170316  
 Time\_ 6.13  
 INSTRUM spect  
 PROBHD 5 mm PABBO BB-  
 PULPROG zgdc30  
 TD 48074  
 SOLVENT MeOD  
 NS 2048  
 DS 4  
 SWH 24038.461 Hz  
 FIDRES 0.590030 Hz  
 AQ 0.9999892 sec  
 RG 2050  
 DW 20.800 usec  
 DE 6.50 usec  
 TE 295.1 K  
 D1 0.00100000 sec  
 D11 0.03000000 sec  
 TD0 1

===== CHANNEL f1 =====  
 SFO1 100.6228293 MHz  
 NUC1 13C  
 P1 9.80 usec  
 SF 32768  
 SF 100.6126272 MHz  
 WDW EM  
 SSB 0  
 LB 1.00 Hz  
 GB 0  
 PC 1.40

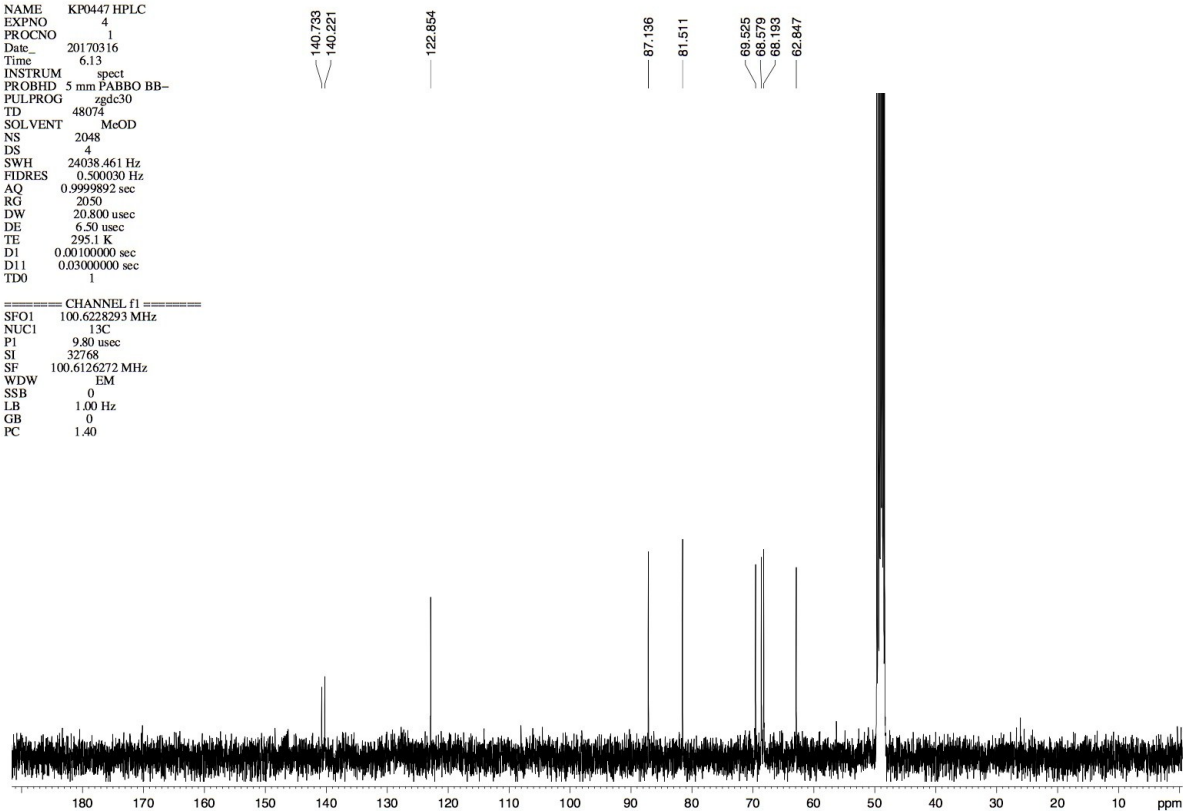



# 3'-Azido-3'-dideoxy-3-[4-(thiazol-2-yl)-1H-1,2,3-triazol-1-yl]-1,1'-sulfanediyl-di-β-D-galactopyranoside 21

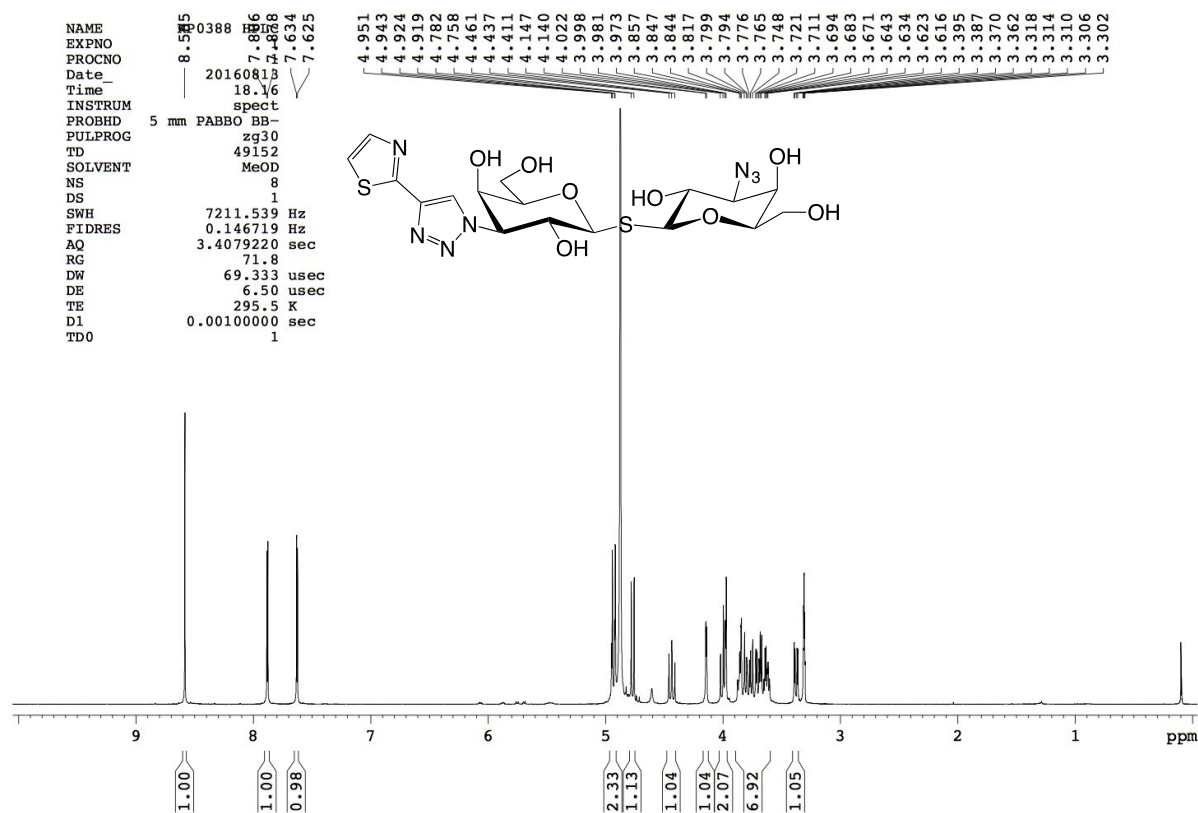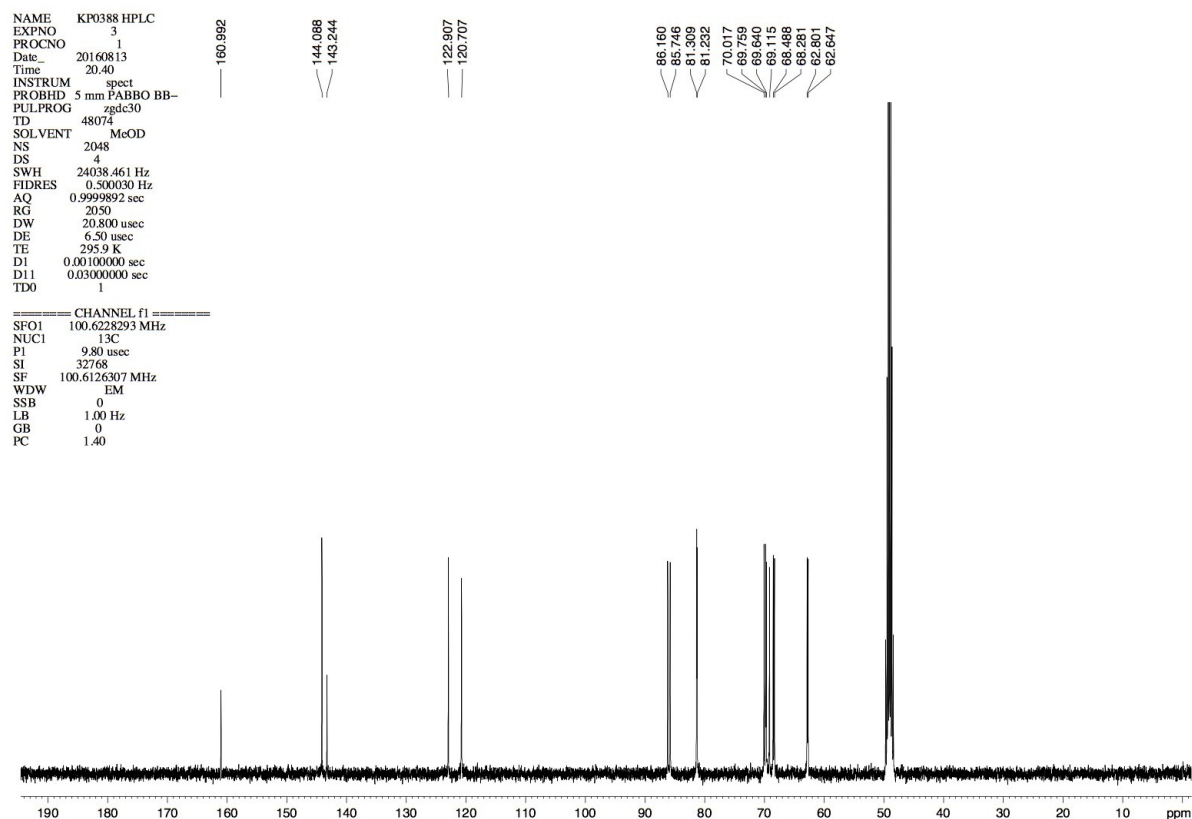

# 3,3'-Dideoxy-3-[4-(thiazol-2-yl)-1H-1,2,3-triazol-1-yl]-3'-[4-(thien-3-yl)-1H-1,2,3-triazol-1-yl]-1,1'-sulfanediyl-di-β-D-galactopyranoside 22

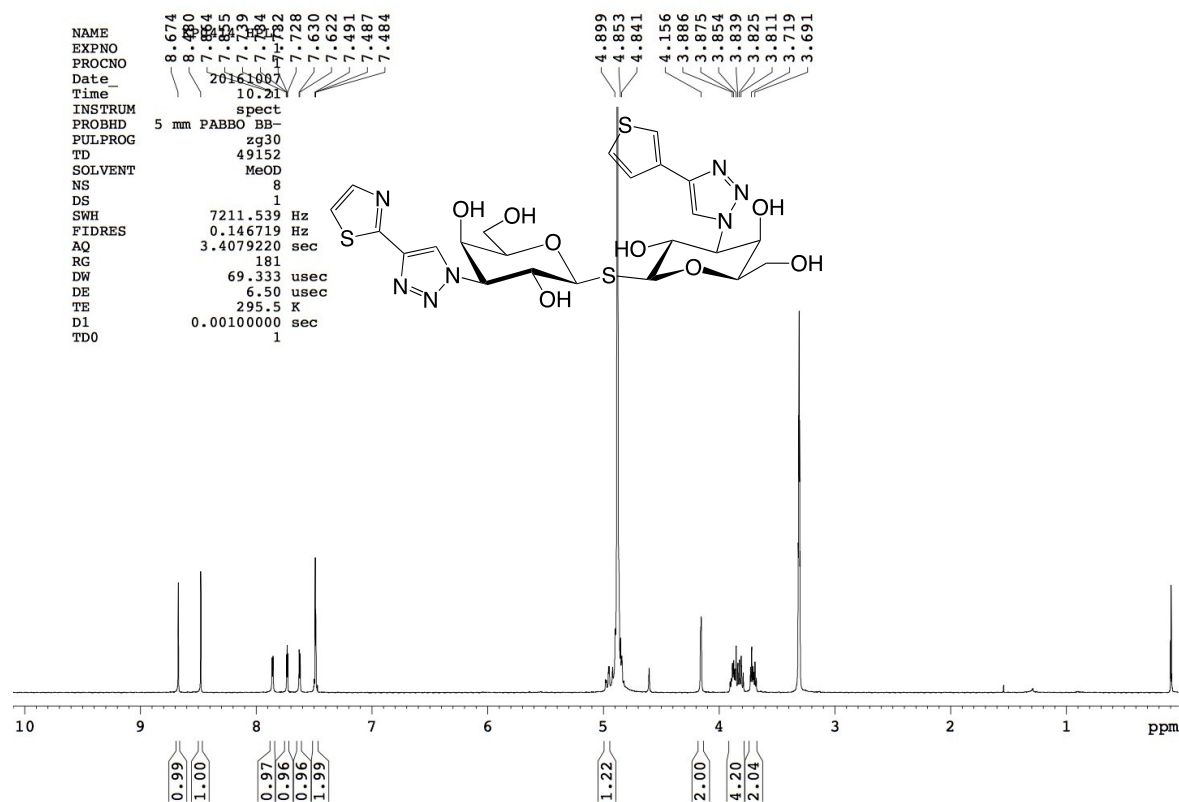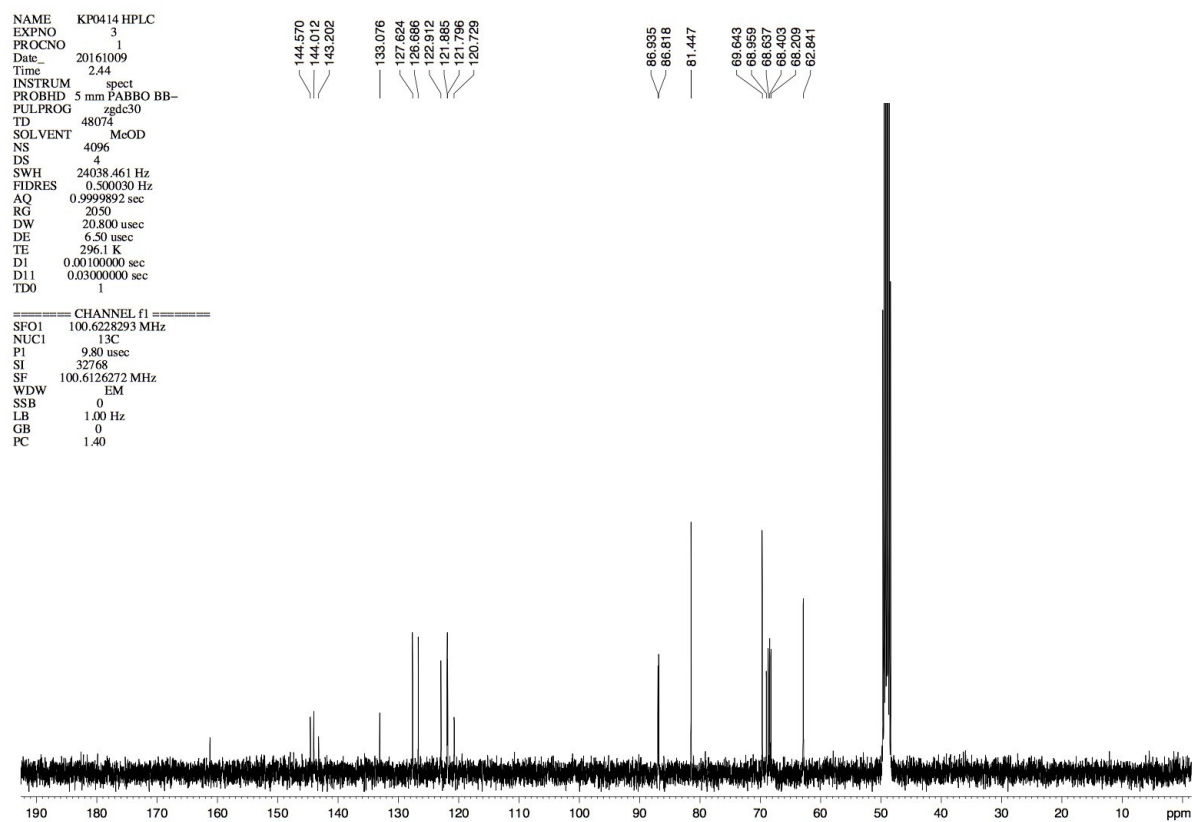

### 3,3'-Dideoxy-3-[4-(thiazol-2-yl)-1H-1,2,3-triazol-1-yl]-3'-[4-(3,4-difluorophenyl)-1H-1,2,3-triazol-1-yl]-1,1'-sulfanediyl-di-β-D-galactopyranoside 23

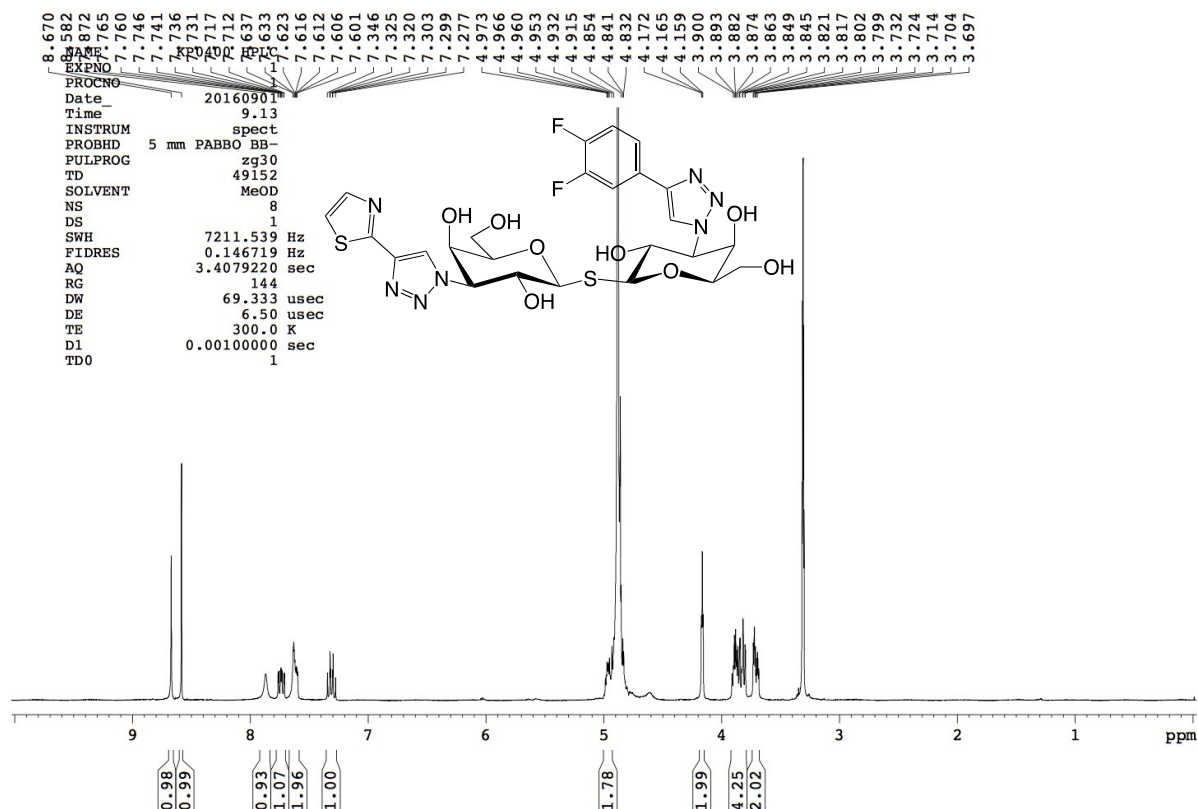

NAME KP0400 HPLC  
 EXPNO 3  
 PROCNO 1  
 Date\_ 20160901  
 Time 20.47  
 INSTRUM spect  
 PROBHD 5 mm PABBO BB-  
 PULPROG zg30  
 TD 48074  
 SOLVENT MeOD  
 NS 2048  
 DS 4  
 SWH 24038.461 Hz  
 FIDRES 0.500030 Hz  
 AQ 0.9999892 sec  
 RG 2050  
 DW 20.800 usec  
 DE 6.50 usec  
 TE 300.0 K  
 D1 0.00100000 sec  
 D11 0.03000000 sec  
 TD0 1

CHANNEL f1  
 SFO1 100.6228293 MHz  
 NUC1 13C  
 P1 9.80 usec  
 SI 32768  
 SF 100.6126483 MHz  
 WDW EM  
 SSB 0  
 LB 1.00 Hz  
 GB 0  
 PC 1.40

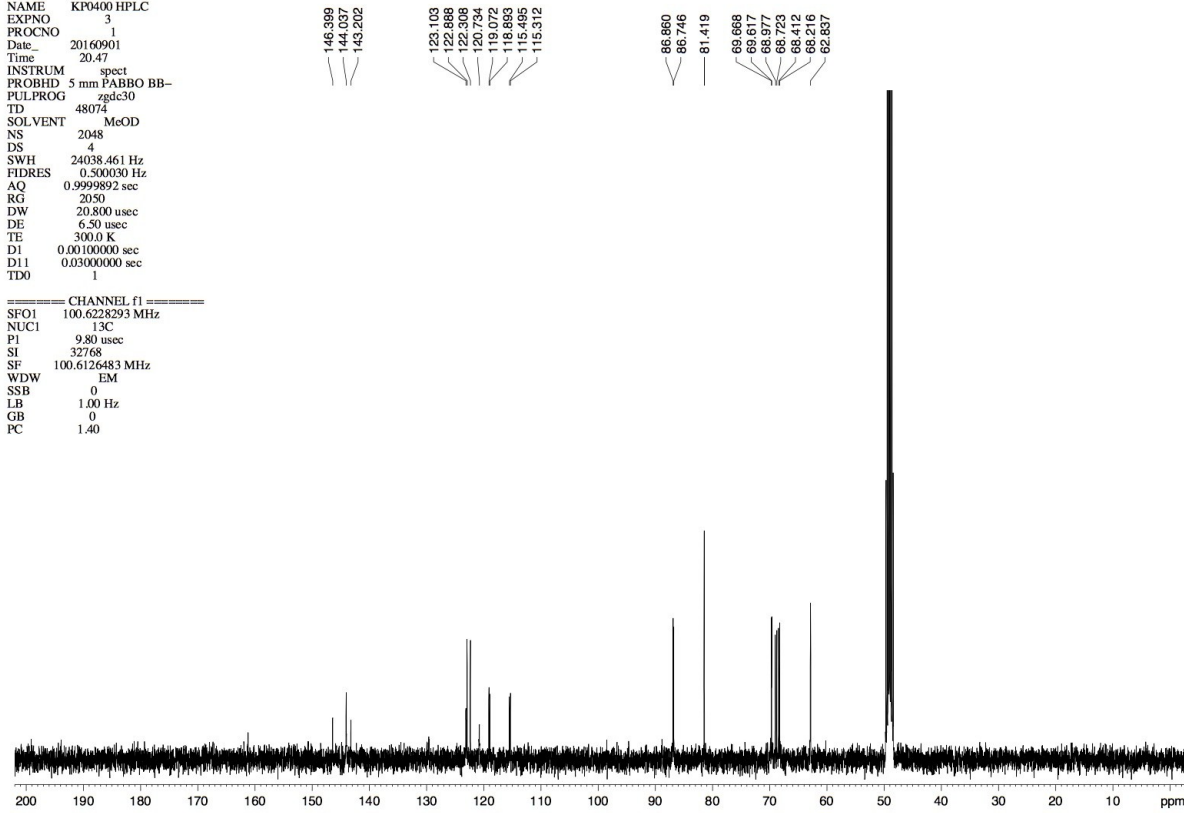

# 3'-Amino-3,3'-dideoxy-3-[4-(thiazol-2-yl)-1H-1,2,3-triazol-1-yl]-1,1'-sulfanediyl-di-β-D-galactopyranoside 24

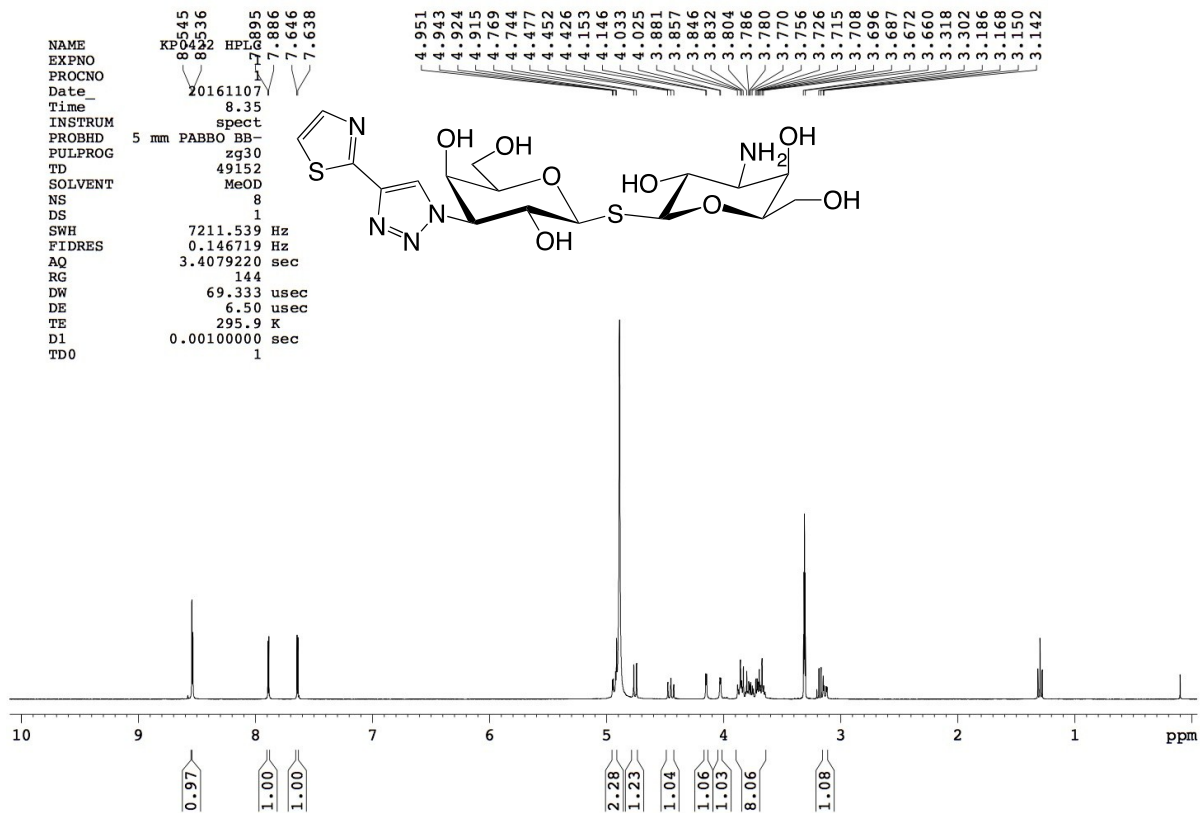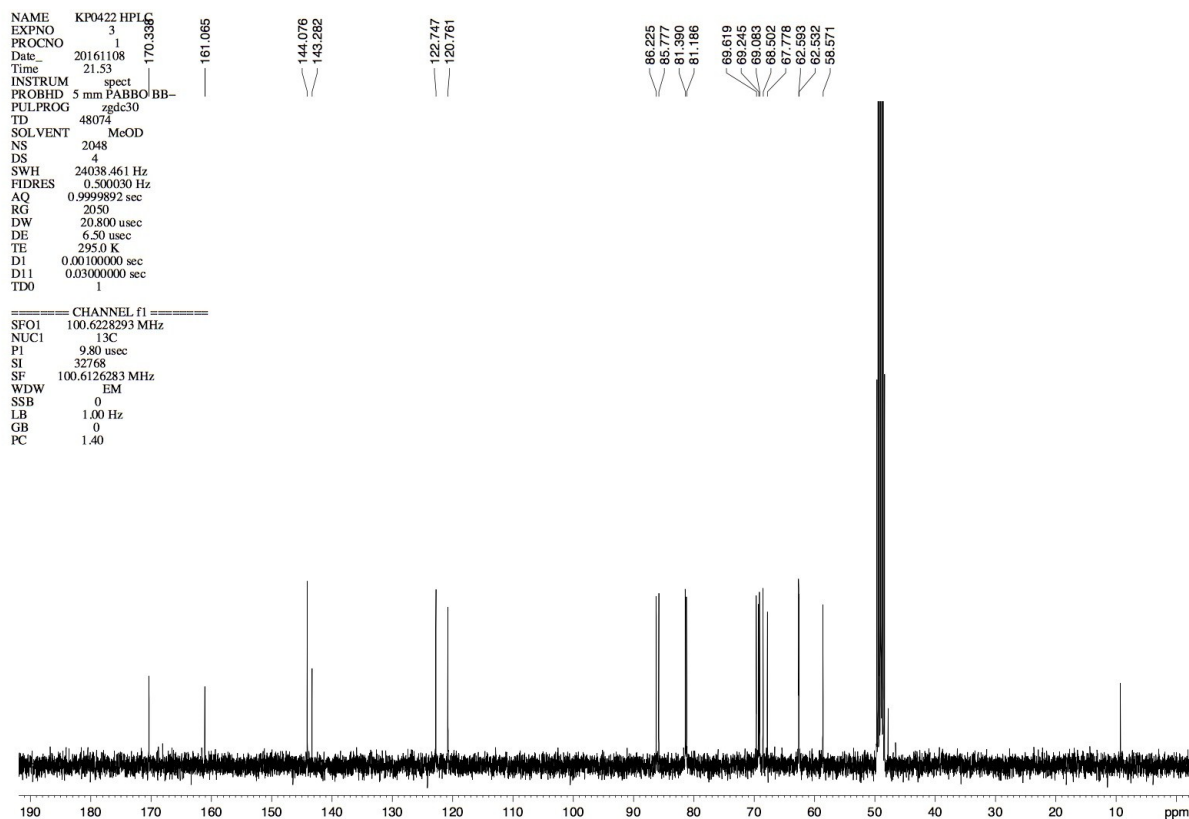

# 3,3'-Dideoxy-3-(fluorescein-5-yl-carbonylamino)-3'-[4-(thiazol-2-yl)-1H-1,2,3-triazol-1-yl]-1,1'-sulfanediyl-di-β-D-galactopyranoside 25

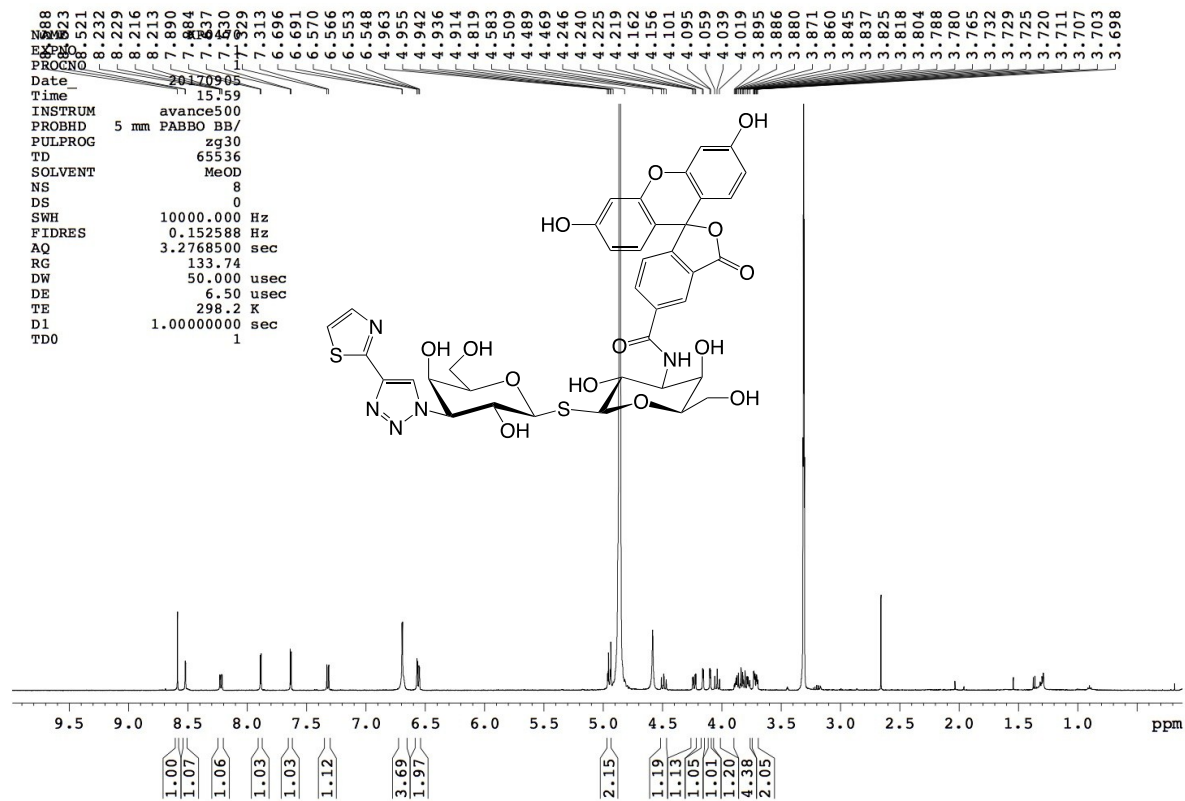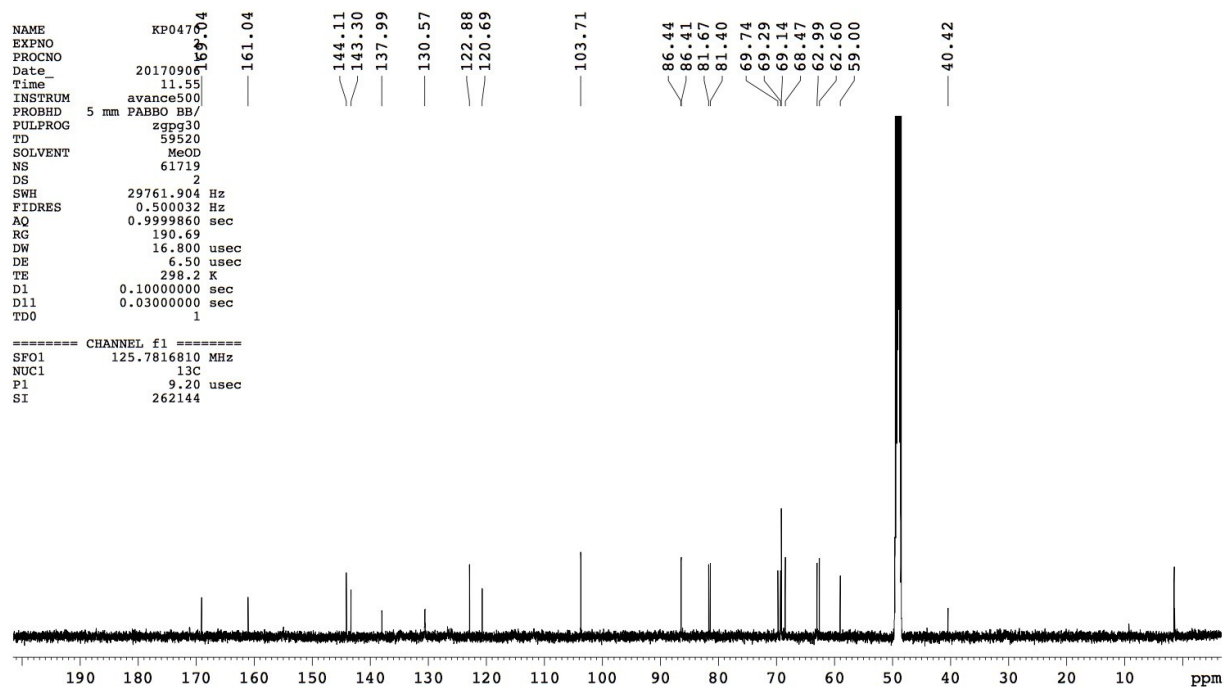



***p*-Methylphenyl 3-deoxy-3-[4-(thien-3-yl)-1*H*-1,2,3-triazol-1-yl]-1-thio- $\beta$ -D-galactopyranoside**

7

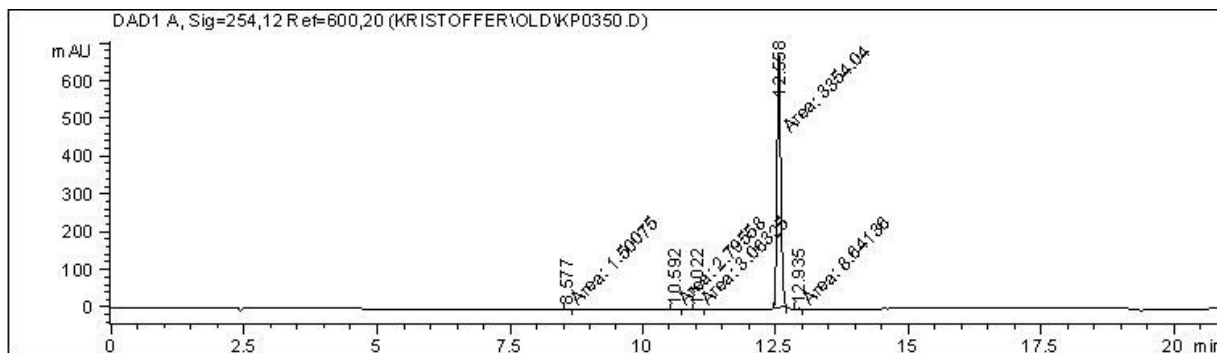

***p*-Methylphenyl 3-deoxy-3-[4-(1*H*-imidazol-2-yl)-1*H*-1,2,3-triazol-1-yl]-1-thio- $\beta$ -D-galactopyranoside 8**

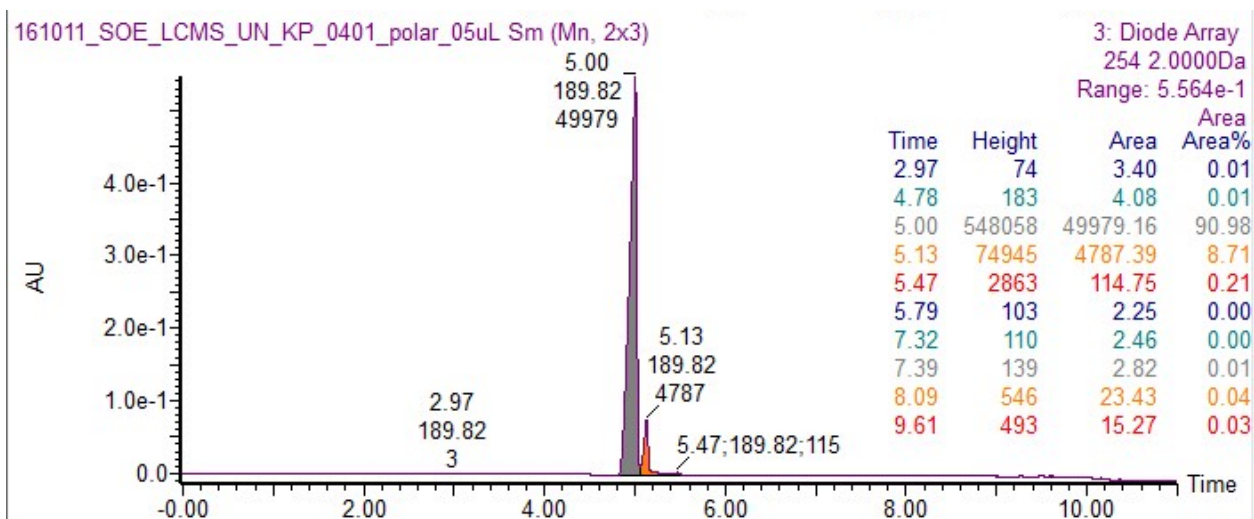

Comment: The two main peaks are isomers with exact mass corresponding to compound **8** and when the analyzed at higher temperature the two peaks merge into one, indicating an equilibrium of isomers.



***p*-Methylphenyl  
galactopyranoside 9**

**3-deoxy-3-[4-(1*H*-imidazol-4-yl)-1*H*-1,2,3-triazol-1-yl]-1-thio- $\beta$ -D-**

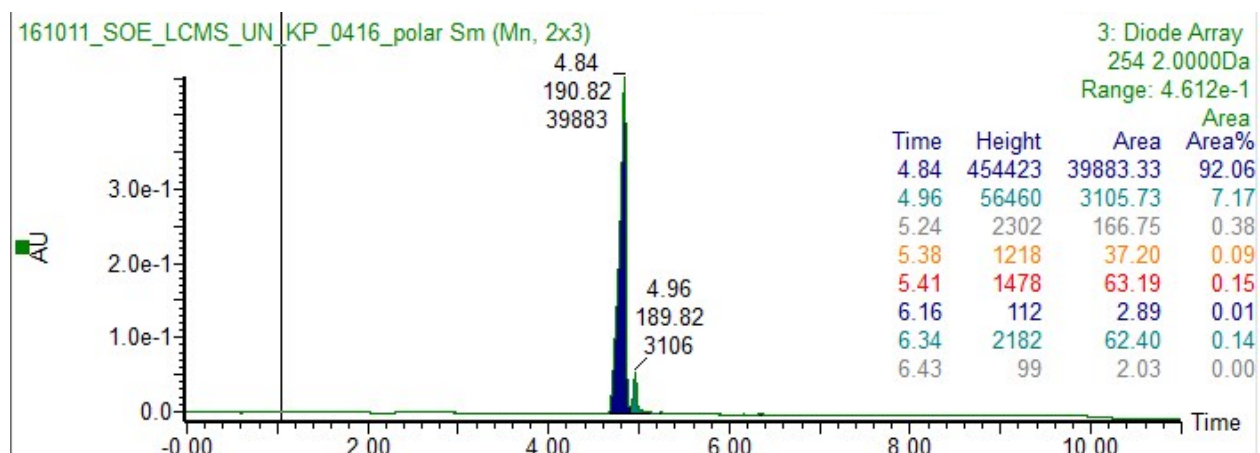

Comment: The two main peaks are isomers with exact mass corresponding to compound **8** and when the analyzed at higher temperature the two peaks merge into one, indicating an equilibrium of isomers.

**1,3-Dideoxy-3-[4-(thien-3-yl)-1*H*-1,2,3-triazol-1-yl]-1-thiocarboxymethyl- $\beta$ -D-  
galactopyranoside 12**

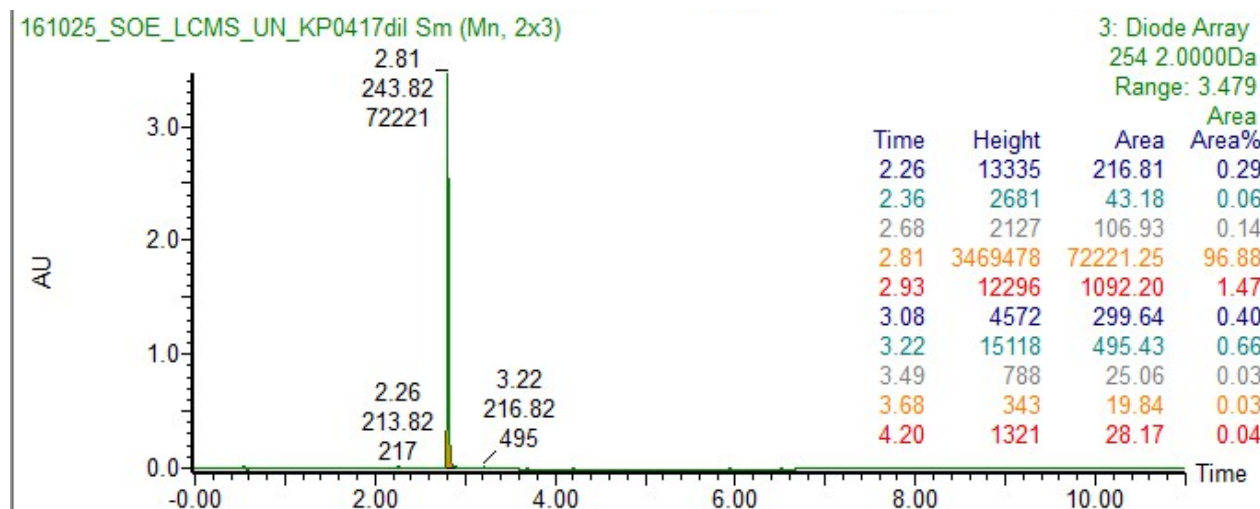



**1,3-Dideoxy-3-[4-(thiazol-2-yl)-1*H*-1,2,3-triazol-1-yl]-1-thiocarboxymethyl- $\beta$ -D-galactopyranoside 13**

160516\_SOE\_LCMS\_UN\_KP0371\_pos Sm (Mn, 2x3)

3: Diode Array  
254 2.0000Da  
Range: 9.036e-1

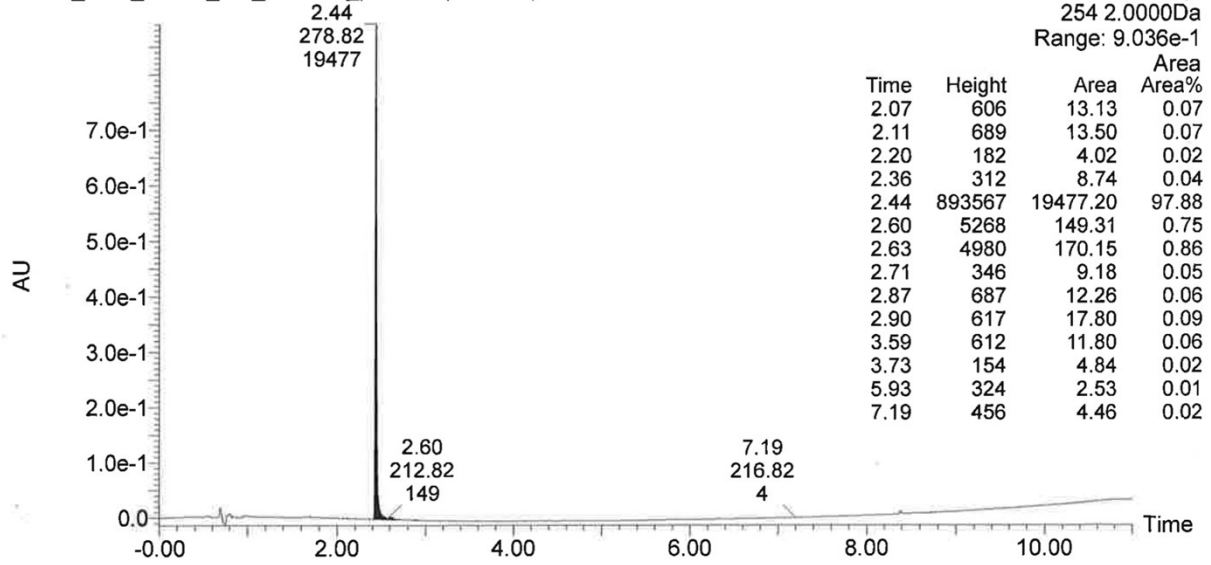

**1,3-Dideoxy-3-[4-(thiazol-4-yl)-1*H*-1,2,3-triazol-1-yl]-1-thiocarboxymethyl- $\beta$ -D-galactopyranoside 14**

160516\_SOE\_LCMS\_UN\_KP0373\_pos Sm (Mn, 2x3)

3: Diode Array  
254 2.0000Da  
Range: 1.871

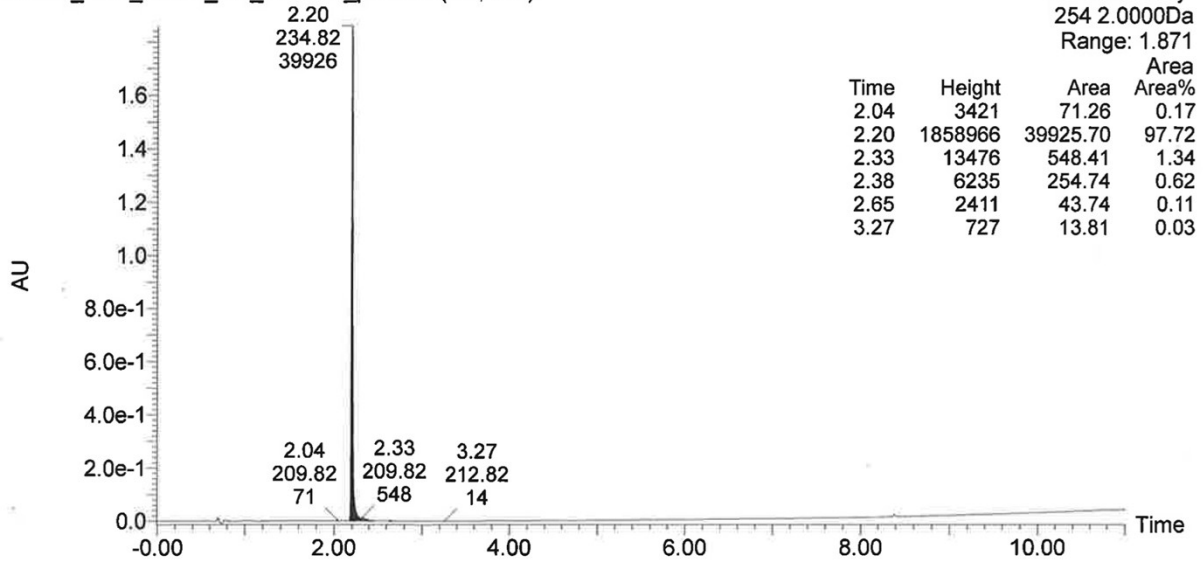

**1,3-Dideoxy-3-[4-(thiazol-5-yl)-1*H*-1,2,3-triazol-1-yl]-1-thiocarboxymethyl- $\beta$ -D-galactopyranoside 15**

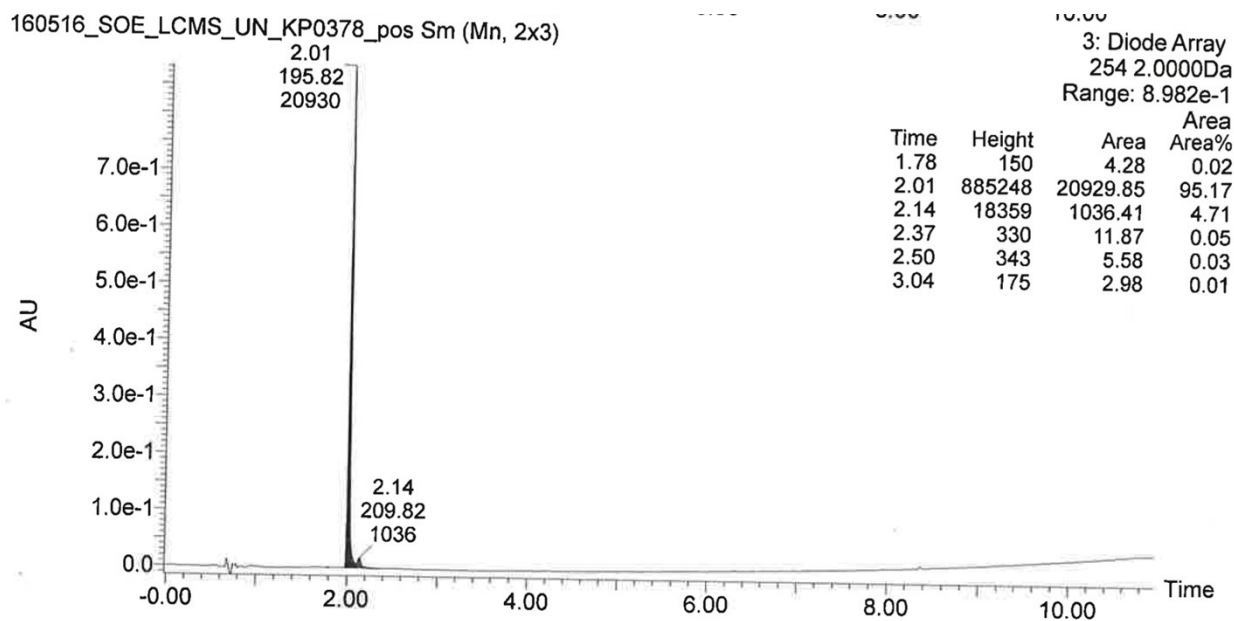

**1-1'-sulfanediyl-bis-{3-deoxy-3-[4-(thiazol-2-yl)-1*H*-1,2,3-triazol-1-yl]- $\beta$ -D-galactopyranoside} 19**

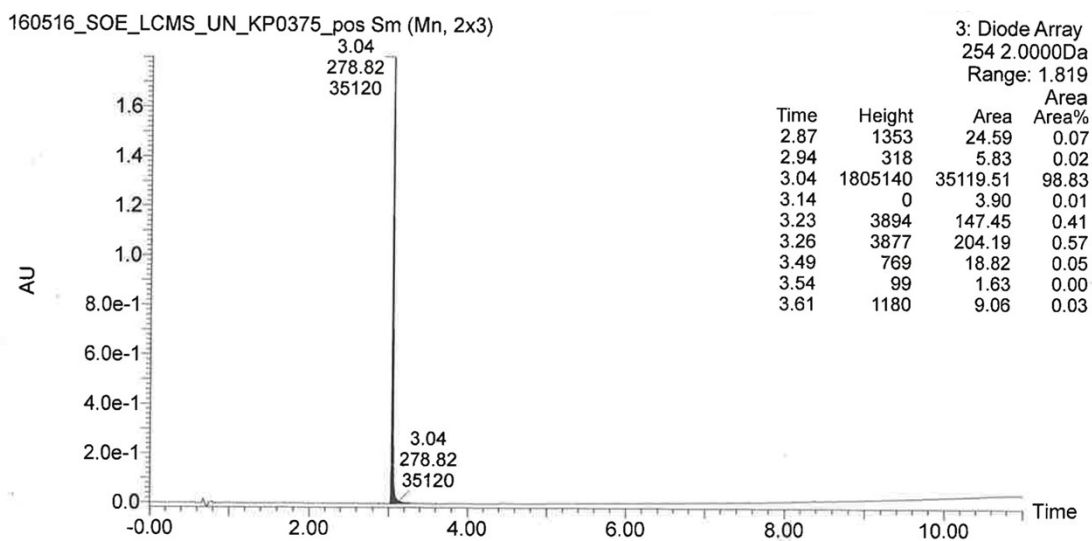

**1-1'-sulfanediyl-bis-{3-deoxy-3-[4-(1*H*-imidazol-2-yl)-1*H*-1,2,3-triazol-1-yl]- $\beta$ -D-galactopyranoside} 20**

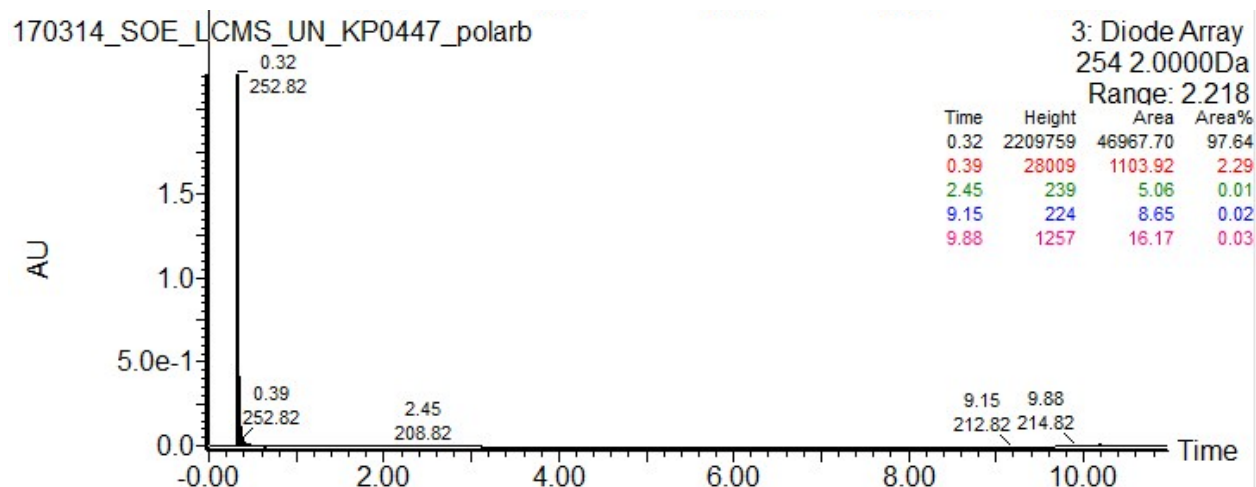

**3,3'-Dideoxy-3-[4-(thiazol-2-yl)-1*H*-1,2,3-triazol-1-yl]-3'-[4-(thien-3-yl)-1*H*-1,2,3-triazol-1-yl]-1,1'-sulfanediyl-di- $\beta$ -D-galactopyranoside 22**

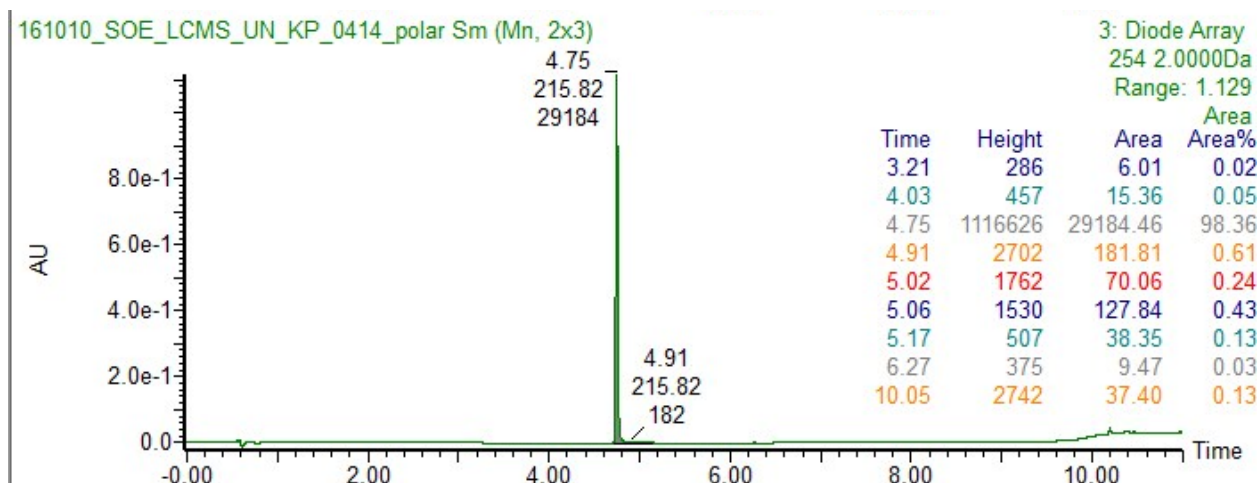

**3,3'-Dideoxy-3-[4-(thiazol-2-yl)-1H-1,2,3-triazol-1-yl]-3'-[4-(3,4-difluorophenyl)-1H-1,2,3-triazol-1-yl]-1,1'-sulfanediyl-di-β-D-galactopyranoside 23**

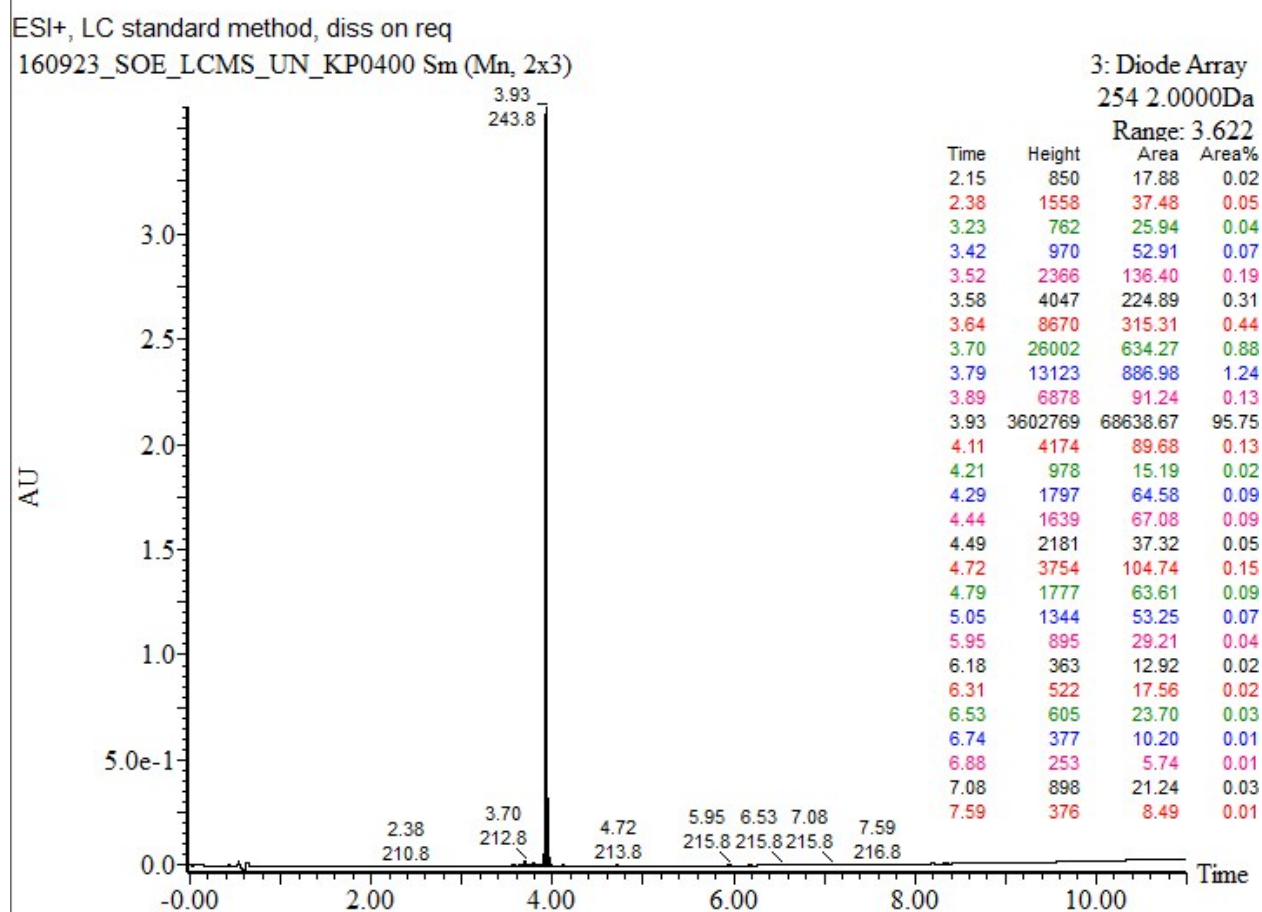

**3,3'-Dideoxy-3-(fluorescein-5-yl-carbonylamino)-3'-[4-(thiazol-2-yl)-1H-1,2,3-triazol-1-yl]-1,1'-sulfanediyl-di-β-D-galactopyranoside 25**

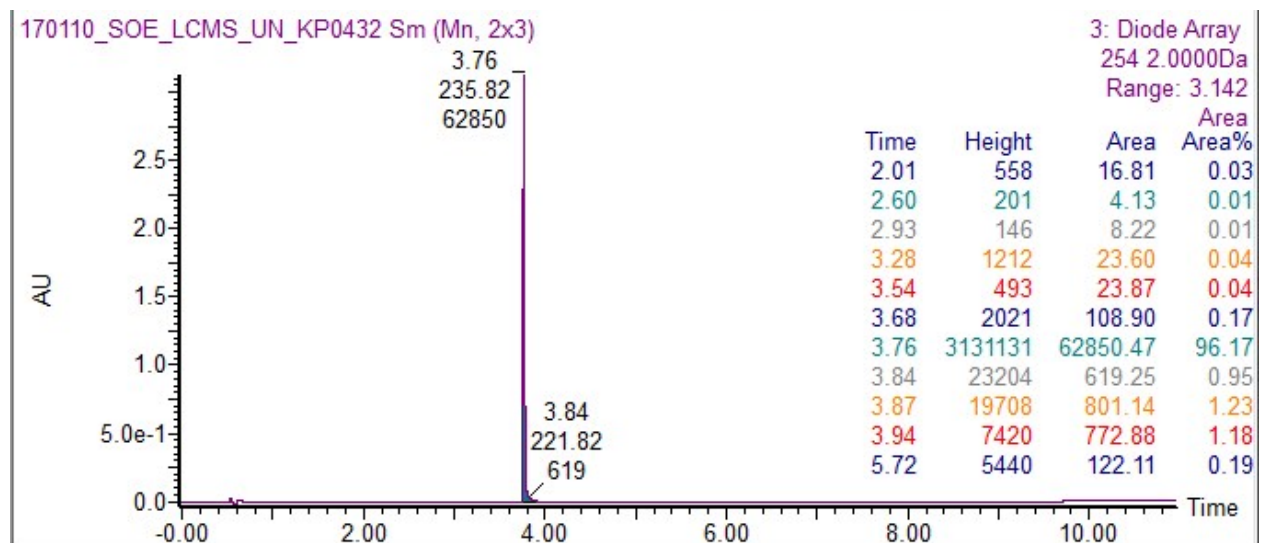

**Figure S1.** Fluorescence polarization titration of galectin-1 with fluorescent probe molecule **25**.

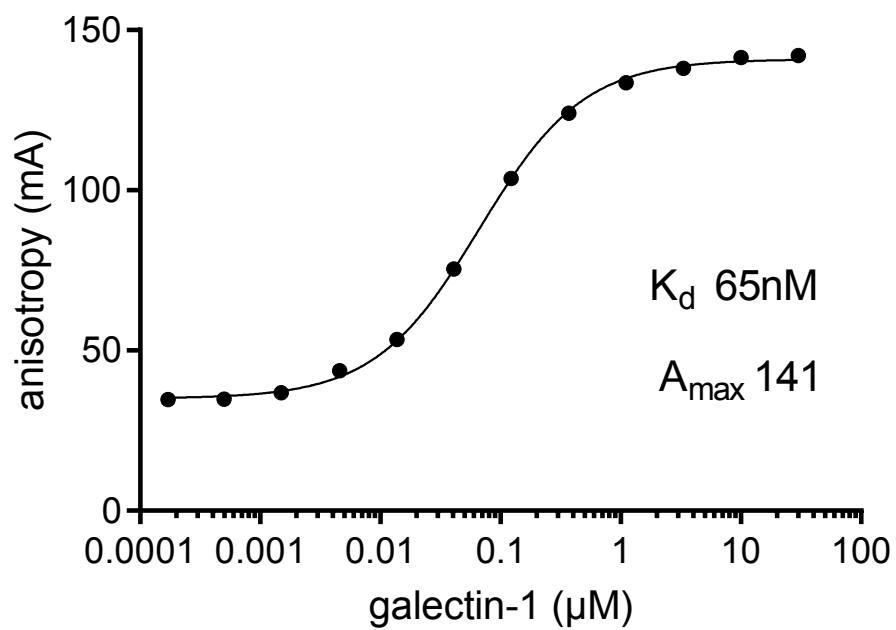

**Figure S2.** Dose response curves compounds 1, 6-7, 12-14 and 19 in a MTT assay.

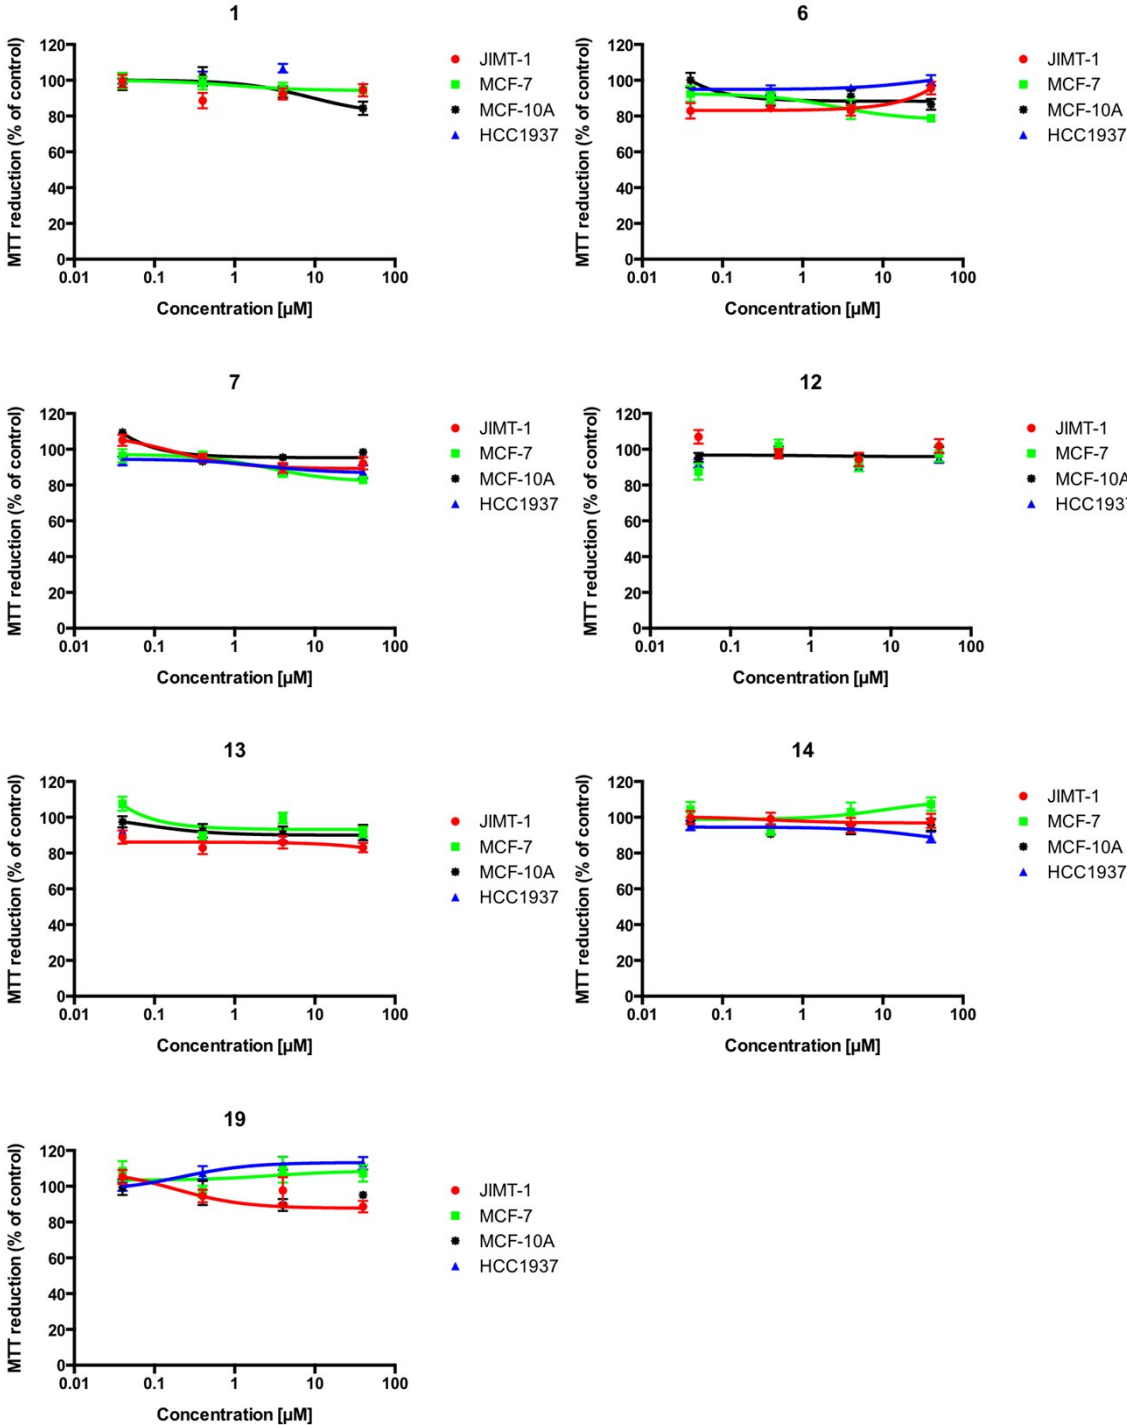

**Table S1.** Crystallographic data and refinement statistics for galectin-1 in complex with **1**.

| Ligand                                 | <b>1</b>                |
|----------------------------------------|-------------------------|
| PDB code                               | 6F83                    |
| Wavelength                             | 1.5418                  |
| Resolution range (Å)                   | 40.58–2.20 (2.279–2.20) |
| Space group                            | $P2_12_12_1$            |
| Cell dimensions $a, b, c$ (Å)          | 44.4, 58.7, 112.4       |
| Total reflections                      | 25 972 (1 310)          |
| Unique reflections                     | 14 260 (872)            |
| Completeness (%)                       | 91.71 (57.00)           |
| Multiplicity                           | 1.8 (1.5)               |
| Wilson B-factor                        | 27.85                   |
| $R_{\text{merge}}$                     | 0.047 (0.407)           |
| $R_{\text{meas}}$                      | 0.066 (0.575)           |
| $R_{\text{pim}}$                       | 0.047 (0.407)           |
| $I / \sigma I$                         | 12.08 (1.80)            |
| $CC_{1/2}$                             | 0.998 (0.68)            |
| $CC^*$                                 | 0.999 (0.9)             |
| Reflections used in refinement         | 14 253 (871)            |
| Reflections used for $R_{\text{free}}$ | 712 (38)                |
| $R_{\text{work}}$                      | 0.216 (0.289)           |
| $R_{\text{free}}$                      | 0.252 (0.324)           |
| $CC_{\text{work}}$                     | 0.964 (0.791)           |
| $CC_{\text{free}}$                     | 0.942 (0.650)           |
| No. of non-hydrogen atoms              | 2 315                   |
| macromolecules                         | 2 156                   |
| ligands                                | 82                      |
| solvent                                | 77                      |
| Protein residues                       | 268                     |
| RMS bond length (Å)                    | 0.012                   |

|                                             |       |
|---------------------------------------------|-------|
| RMS bond angle (°)                          | 1.59  |
| Ramachandran favored (%)                    | 97.01 |
| Ramachandran allowed (%)                    | 2.56  |
| Ramachandran outliers (%)                   | 0.43  |
| Rotamer outliers (%)                        | 5.09  |
| Clashscore                                  | 5.32  |
| Average <i>B</i> -factors (Å <sup>2</sup> ) | 16.0  |
| macromolecules                              | 13.8  |
| ligands                                     | 55.0  |
| solvent                                     | 35.3  |
| Number of TLS groups                        | 2     |

Statistics for the highest-resolution shell are shown in parentheses
